# Supplementary material for: Integrated identification of key genes and pathways in Alzheimer’s disease via comprehensive bioinformatical analyses
Source: Hereditas. 2019 Jul 16;156:25. doi: 10.1186/s41065-019-0101-0 (PMC6636172; doi:10.1186/s41065-019-0101-0)
Supplement: Supplementary file 1 — Table S1. Information for samples in the included datasets. (ArrayExpress datasets). Included detailed information of samples of hippocampus and entorhinal cortex regions extracted from GSE48350. (XLSX 14 kb) [file 41065_2019_101_MOESM1_ESM.xlsx]

## Sheet: 新建文本文档
Additional file 1: Table S1 Information for samples in the included datasets. (ArrayExpress datasets)
Source Name	Characteristics [organism]	Characteristics [sex]	Characteristics [age]	Unit [time unit]	Characteristics[organism status]	Characteristics[organism part]	Characteristics[disease]	Characteristics[clinical information]
GSM1176229 1	Homo sapiens	male	94	year	post-mortem	hippocampus	Alzheimers disease	Braak stage IV
GSM1176228 1	Homo sapiens	male	94	year	post-mortem	hippocampus	Alzheimers disease	Braak stage VI
GSM1176227 1	Homo sapiens	male	87	year	post-mortem	hippocampus	Alzheimers disease	Braak stage V
GSM1176226 1	Homo sapiens	male	86	year	post-mortem	hippocampus	Alzheimers disease	Braak stage IV
GSM1176225 1	Homo sapiens	male	85	year	post-mortem	hippocampus	Alzheimers disease	Braak stage III
GSM1176224 1	Homo sapiens	male	80	year	post-mortem	hippocampus	Alzheimers disease	not available
GSM1176223 1	Homo sapiens	male	79	year	post-mortem	hippocampus	Alzheimers disease	Braak stage VI
GSM1176222 1	Homo sapiens	male	76	year	post-mortem	hippocampus	Alzheimers disease	Braak stage III
GSM1176221 1	Homo sapiens	male	76	year	post-mortem	hippocampus	Alzheimers disease	Braak stage V
GSM1176220 1	Homo sapiens	female	91	year	post-mortem	hippocampus	Alzheimers disease	Braak stage V-VI
GSM1176219 1	Homo sapiens	female	90	year	post-mortem	hippocampus	Alzheimers disease	Braak stage III
GSM1176218 1	Homo sapiens	female	90	year	post-mortem	hippocampus	Alzheimers disease	Braak stage IV
GSM1176217 1	Homo sapiens	female	90	year	post-mortem	hippocampus	Alzheimers disease	Braak stage VI
GSM1176216 1	Homo sapiens	female	85	year	post-mortem	hippocampus	Alzheimers disease	Braak stage IV
GSM1176215 1	Homo sapiens	female	86	year	post-mortem	hippocampus	Alzheimers disease	Braak stage VI
GSM1176214 1	Homo sapiens	female	79	year	post-mortem	hippocampus	Alzheimers disease	Braak stage VI
GSM1176213 1	Homo sapiens	female	76	year	post-mortem	hippocampus	Alzheimers disease	Braak stage V
GSM1176212 1	Homo sapiens	female	74	year	post-mortem	hippocampus	Alzheimers disease	Braak stage VI
GSM300339 1	Homo sapiens	female	82	year	post-mortem	hippocampus	normal	not applicable
GSM300333 1	Homo sapiens	male	75	year	post-mortem	hippocampus	normal	not applicable
GSM300329 1	Homo sapiens	female	91	year	post-mortem	hippocampus	normal	not applicable
GSM300325 1	Homo sapiens	male	69	year	post-mortem	hippocampus	normal	not applicable
GSM300286 1	Homo sapiens	male	69	year	post-mortem	hippocampus	normal	not applicable
GSM300268 1	Homo sapiens	male	86	year	post-mortem	hippocampus	normal	not applicable
GSM300255 1	Homo sapiens	male	69	year	post-mortem	hippocampus	normal	not applicable
GSM300239 1	Homo sapiens	female	70	year	post-mortem	hippocampus	normal	not applicable
GSM300235 1	Homo sapiens	male	85	year	post-mortem	hippocampus	normal	not applicable
GSM300227 1	Homo sapiens	female	91	year	post-mortem	hippocampus	normal	not applicable
GSM300223 1	Homo sapiens	female	74	year	post-mortem	hippocampus	normal	not applicable
GSM300215 1	Homo sapiens	male	97	year	post-mortem	hippocampus	normal	not applicable
GSM300205 1	Homo sapiens	male	83	year	post-mortem	hippocampus	normal	not applicable
GSM300197 1	Homo sapiens	female	74	year	post-mortem	hippocampus	normal	not applicable
GSM300193 1	Homo sapiens	female	99	year	post-mortem	hippocampus	normal	not applicable
GSM300190 1	Homo sapiens	female	74	year	post-mortem	hippocampus	normal	not applicable
GSM300185 1	Homo sapiens	male	91	year	post-mortem	hippocampus	normal	not applicable
GSM300182 1	Homo sapiens	male	80	year	post-mortem	hippocampus	normal	not applicable
GSM300178 1	Homo sapiens	male	95	year	post-mortem	hippocampus	normal	not applicable
GSM300172 1	Homo sapiens	female	82	year	post-mortem	hippocampus	normal	not applicable
GSM300171 1	Homo sapiens	female	87	year	post-mortem	hippocampus	normal	not applicable
GSM300170 1	Homo sapiens	male	84	year	post-mortem	hippocampus	normal	not applicable
GSM300169 1	Homo sapiens	male	82	year	post-mortem	hippocampus	normal	not applicable
GSM300168 1	Homo sapiens	female	96	year	post-mortem	hippocampus	normal	not applicable
GSM1176210 1	Homo sapiens	male	94	year	post-mortem	entorhinal cortex	Alzheimers disease	Braak stage IV
GSM1176209 1	Homo sapiens	male	94	year	post-mortem	entorhinal cortex	Alzheimers disease	Braak stage VI
GSM1176208 1	Homo sapiens	male	87	year	post-mortem	entorhinal cortex	Alzheimers disease	Braak stage V
GSM1176207 1	Homo sapiens	male	86	year	post-mortem	entorhinal cortex	Alzheimers disease	Braak stage IV
GSM1176206 1	Homo sapiens	male	85	year	post-mortem	entorhinal cortex	Alzheimers disease	Braak stage II
GSM1176205 1	Homo sapiens	male	85	year	post-mortem	entorhinal cortex	Alzheimers disease	Braak stage III
GSM1176204 1	Homo sapiens	male	76	year	post-mortem	entorhinal cortex	Alzheimers disease	Braak stage III
GSM1176203 1	Homo sapiens	female	91	year	post-mortem	entorhinal cortex	Alzheimers disease	Braak stage V-VI
GSM1176202 1	Homo sapiens	female	90	year	post-mortem	entorhinal cortex	Alzheimers disease	Braak stage III
GSM1176201 1	Homo sapiens	female	90	year	post-mortem	entorhinal cortex	Alzheimers disease	Braak stage V
GSM1176200 1	Homo sapiens	female	90	year	post-mortem	entorhinal cortex	Alzheimers disease	Braak stage IV
GSM1176199 1	Homo sapiens	female	85	year	post-mortem	entorhinal cortex	Alzheimers disease	Braak stage IV
GSM1176198 1	Homo sapiens	female	82	year	post-mortem	entorhinal cortex	Alzheimers disease	Braak stage VI
GSM1176197 1	Homo sapiens	female	86	year	post-mortem	entorhinal cortex	Alzheimers disease	Braak stage VI
GSM1176196 1	Homo sapiens	female	76	year	post-mortem	entorhinal cortex	Alzheimers disease	Braak stage V
GSM300338 1	Homo sapiens	female	82	year	post-mortem	entorhinal cortex	normal	not applicable
GSM300332 1	Homo sapiens	male	75	year	post-mortem	entorhinal cortex	normal	not applicable
GSM300328 1	Homo sapiens	female	91	year	post-mortem	entorhinal cortex	normal	not applicable
GSM300324 1	Homo sapiens	male	69	year	post-mortem	entorhinal cortex	normal	not applicable
GSM300285 1	Homo sapiens	male	69	year	post-mortem	entorhinal cortex	normal	not applicable
GSM300267 1	Homo sapiens	male	86	year	post-mortem	entorhinal cortex	normal	not applicable
GSM300248 1	Homo sapiens	female	85	year	post-mortem	entorhinal cortex	normal	not applicable
GSM300238 1	Homo sapiens	female	70	year	post-mortem	entorhinal cortex	normal	not applicable
GSM300234 1	Homo sapiens	male	85	year	post-mortem	entorhinal cortex	normal	not applicable
GSM300222 1	Homo sapiens	female	74	year	post-mortem	entorhinal cortex	normal	not applicable
GSM300214 1	Homo sapiens	male	97	year	post-mortem	entorhinal cortex	normal	not applicable
GSM300204 1	Homo sapiens	male	83	year	post-mortem	entorhinal cortex	normal	not applicable
GSM300196 1	Homo sapiens	female	74	year	post-mortem	entorhinal cortex	normal	not applicable
GSM300192 1	Homo sapiens	female	99	year	post-mortem	entorhinal cortex	normal	not applicable
GSM300189 1	Homo sapiens	female	74	year	post-mortem	entorhinal cortex	normal	not applicable
GSM300181 1	Homo sapiens	male	80	year	post-mortem	entorhinal cortex	normal	not applicable
GSM300177 1	Homo sapiens	male	95	year	post-mortem	entorhinal cortex	normal	not applicable
