# Supplementary material for: Integrated identification of key genes and pathways in Alzheimer’s disease via comprehensive bioinformatical analyses
Source: Hereditas. 2019 Jul 16;156:25. doi: 10.1186/s41065-019-0101-0 (PMC6636172; doi:10.1186/s41065-019-0101-0)
Supplement: Supplementary file 2 — Table S2. Information for the DEGs identified from the GEO dataset (|log2FC| ≥ 1, p value< 0.05). Included detailed information of all DEGs screened from hippocampus and entorhinal cortex regions. (XLSX 31 kb) [file 41065_2019_101_MOESM2_ESM.xlsx]

## Sheet: Sheet1
Additional file 2: Table S2 Information for the DEGs identified from the GEO dataset (|log2FC| ≥ 1, p value < 0.05 ).
Hippcampus
Gene symbol	Gene title	logFC	P value	False discovery rate	Category
ANKIB1	ankyrin repeat and IBR domain containing 1	5.07211	0	0.05	Up-regulated gene
SLC25A46	solute carrier family 25 member 46	3.74846	0	0.05	Up-regulated gene
ZNF621	zinc finger protein 621	2.9782	0	0.05	Up-regulated gene
XIST	X inactive specific transcript (non-protein coding)	2.61353	0.01	0.05	Up-regulated gene
C1orf87	chromosome 1 open reading frame 87	1.99639	0.04	0.13	Up-regulated gene
MAP3K19	mitogen-activated protein kinase kinase kinase 19	1.94486	0.01	0.07	Up-regulated gene
CD163	CD163 molecule	1.87578	0.02	0.08	Up-regulated gene
LTF	lactotransferrin	1.87184	0.01	0.06	Up-regulated gene
AGBL2	ATP/GTP binding protein like 2	1.72247	0.02	0.09	Up-regulated gene
PZP	pregnancy-zone protein	1.70044	0.03	0.1	Up-regulated gene
TAC1	tachykinin precursor 1	1.70044	0.02	0.08	Up-regulated gene
IGFBP7-AS1	IGFBP7 antisense RNA 1	1.65535	0.02	0.08	Up-regulated gene
SLC27A6	solute carrier family 27 member 6	1.63227	0.02	0.08	Up-regulated gene
C1orf192	chromosome 1 open reading frame 192	1.61353	0.01	0.05	Up-regulated gene
CD44	CD44 molecule (Indian blood group)	1.54102	0.02	0.08	Up-regulated gene
SYNE2	spectrin repeat containing nuclear envelope protein 2	1.46989	0	0.05	Up-regulated gene
FAM216B	family with sequence similarity 216 member B	1.46989	0.03	0.11	Up-regulated gene
ABCA6	ATP binding cassette subfamily A member 6	1.42761	0.01	0.07	Up-regulated gene
SPATA18	spermatogenesis associated 18	1.41684	0.01	0.07	Up-regulated gene
CCDC11	coiled-coil domain containing 117	1.36177	0.02	0.08	Up-regulated gene
FAM81B	family with sequence similarity 81 member B	1.34483	0.03	0.11	Up-regulated gene
SERPINI2	serpin family I member 2	1.33914	0	0.05	Up-regulated gene
CRLF1	cytokine receptor like factor 1	1.33914	0.01	0.06	Up-regulated gene
WDR49	WD repeat domain 49	1.31615	0.01	0.06	Up-regulated gene
TNFRSF11B	tumor necrosis factor receptor superfamily, member 11b	1.31034	0.01	0.05	Up-regulated gene
DNAAF3	dynein axonemal assembly factor 3	1.29278	0.01	0.07	Up-regulated gene
CDK19	cyclin dependent kinase 19	1.25096	0	0.05	Up-regulated gene
RASSF9	Ras association domain family member 9	1.23879	0.01	0.05	Up-regulated gene
FREM3	FRAS1 related extracellular matrix 3	1.22651	0	0.05	Up-regulated gene
ANKFN1	ankyrin repeat and fibronectin type III domain containing 1	1.19535	0	0.05	Up-regulated gene
ZBBX	zinc finger, B-box domain containing	1.19535	0.03	0.1	Up-regulated gene
ART3	ADP-ribosyltransferase 3	1.18903	0	0.05	Up-regulated gene
CAPS	calcyphosine	1.17632	0	0.05	Up-regulated gene
SLC7A11	solute carrier family 7 member 11	1.17632	0.02	0.08	Up-regulated gene
PIH1D3	PIH1 domain containing 3	1.1635	0.04	0.13	Up-regulated gene
WWTR1	WW domain containing transcription regulator 1	1.1635	0.01	0.06	Up-regulated gene
CCDC81	coiled-coil domain containing 81	1.15056	0.01	0.07	Up-regulated gene
EFCAB1	EF-hand calcium binding domain 11	1.15056	0.02	0.08	Up-regulated gene
TEX26	testis expressed 26	1.1375	0	0.05	Up-regulated gene
EFEMP1	EGF containing fibulin like extracellular matrix protein 1	1.1177	0.01	0.06	Up-regulated gene
DNAH6	dynein axonemal heavy chain 6	1.11103	0	0.05	Up-regulated gene
SLC19A3	solute carrier family 19 member 3	1.10434	0.01	0.07	Up-regulated gene
C21orf62	chromosome 21 open reading frame 62	1.10434	0	0.05	Up-regulated gene
TDGF1 /// TDGF1P3	teratocarcinoma-derived growth factor 1 pseudogene 3///teratocarcinoma-derived growth factor 1	1.10434	0.04	0.12	Up-regulated gene
MORN5	MORN repeat containing 5	1.08406	0.01	0.07	Up-regulated gene
STON2	stonin 2	1.07039	0	0.05	Up-regulated gene
CP	ceruloplasmin (ferroxidase)	1.0635	0.01	0.05	Up-regulated gene
DYNC2H1	dynein cytoplasmic 2 heavy chain 1	1.05658	0.02	0.08	Up-regulated gene
ECM2	extracellular matrix protein 2	1.04963	0.02	0.08	Up-regulated gene
WDR96	WD repeat domain 96	1.03562	0.01	0.06	Up-regulated gene
CXorf30	chromosome X open reading frame 30	1.02148	0.03	0.1	Up-regulated gene
FANCB	Fanconi anemia complementation group B	1.02148	0.02	0.08	Up-regulated gene
CDC14A	cell division cycle 14A	1.01436	0	0.05	Up-regulated gene
LEPR /// LEPROT	leptin receptor overlapping transcript///leptin receptor	1.0072	0.02	0.08	Up-regulated gene
FHL5	four and a half LIM domains 5	1.0072	0.01	0.06	Up-regulated gene
ARHGEF7	Rho guanine nucleotide exchange factor 7	1	0	0.05	Up-regulated gene
NWD2	NACHT and WD repeat domain containing 2	-1	0.01	0.07	Down-regulated gene
ADAD2	adenosine deaminase domain containing 2	-1	0.03	0.11	Down-regulated gene
BSN	bassoon presynaptic cytomatrix protein	-1	0.01	0.06	Down-regulated gene
AMPH	amphiphysin	-1	0.01	0.07	Down-regulated gene
SLC26A10	solute carrier family 26 member 10	-1	0.03	0.1	Down-regulated gene
NRP1	neuropilin 1	-1	0.01	0.06	Down-regulated gene
CYP2A7P1	cytochrome P450 family 2 subfamily A member 7 pseudogene 1	-1	0	0.05	Down-regulated gene
EBP	emopamil binding protein (sterol isomerase)	-1	0	0.05	Down-regulated gene
PCLO	piccolo presynaptic cytomatrix protein	-1	0	0.05	Down-regulated gene
ETNK1	ethanolamine kinase 1	-1	0	0.05	Down-regulated gene
SLC24A3	solute carrier family 24 member 3	-1	0.03	0.11	Down-regulated gene
KIT	KIT proto-oncogene receptor tyrosine kinase	-1	0.03	0.1	Down-regulated gene
KCNJ6	potassium voltage-gated channel subfamily J member 6	-1	0.01	0.07	Down-regulated gene
DDX50	DEAD-box helicase 50	-1	0.01	0.06	Down-regulated gene
CD300C	CD300c molecule	-1	0.02	0.09	Down-regulated gene
DIRAS3	DIRAS family GTPase 3	-1	0.01	0.07	Down-regulated gene
RAB3C	RAB3C, member RAS oncogene family	-1	0.02	0.08	Down-regulated gene
TTC5	tetratricopeptide repeat domain 5	-1	0	0.05	Down-regulated gene
KCNG3	potassium voltage-gated channel modifier subfamily G member 3	-1	0.04	0.13	Down-regulated gene
KALRN	kalirin, RhoGEF kinase	-1	0	0.05	Down-regulated gene
SCNN1G	sodium channel epithelial 1 gamma subunit	-1	0	0.05	Down-regulated gene
ACSL4	acyl-CoA synthetase long-chain family member 4	-1	0.01	0.06	Down-regulated gene
MICAL2	"microtubule associated monooxygenase, calponin and LIM domain containing 2	-1	0.02	0.08	Down-regulated gene
MAP7D2	MAP7 domain containing 2	-1	0	0.05	Down-regulated gene
CALY	calcyon neuron specific vesicular protein	-1	0	0.05	Down-regulated gene
SOX1	SRY-box 1	-1	0	0.05	Down-regulated gene
C16orf74	chromosome 16 open reading frame 74	-1.02915	0	0.05	Down-regulated gene
DNASE1L2	deoxyribonuclease 1 like 2	-1.02915	0.02	0.08	Down-regulated gene
NEFH	neurofilament heavy polypeptide	-1.02915	0.02	0.08	Down-regulated gene
ANK1	ankyrin 1	-1.02915	0.01	0.05	Down-regulated gene
COL2A1	collagen type II alpha 1 chain	-1.02915	0.04	0.12	Down-regulated gene
RCOR3	REST corepressor 3	-1.02915	0	0.05	Down-regulated gene
GABRG2	gamma-aminobutyric acid type A receptor gamma2 subunit	-1.02915	0.03	0.1	Down-regulated gene
SPDEF	SAM pointed domain containing ETS transcription factor"	-1.02915	0	0.05	Down-regulated gene
ACHE	acetylcholinesterase (Cartwright blood group)	-1.02915	0	0.05	Down-regulated gene
RDH10	retinol dehydrogenase 10 (all-trans)	-1.02915	0	0.05	Down-regulated gene
TRAF3IP1	TRAF3 interacting protein 1	-1.02915	0	0.05	Down-regulated gene
CNR1	cannabinoid receptor 1	-1.02915	0.01	0.06	Down-regulated gene
TMEM35	transmembrane protein 35A	-1.02915	0.01	0.07	Down-regulated gene
PDPN	podoplanin	-1.02915	0.02	0.09	Down-regulated gene
F12	coagulation factor XII	-1.02915	0.03	0.1	Down-regulated gene
KCNC1	potassium voltage-gated channel subfamily C member 1	-1.05889	0	0.05	Down-regulated gene
OBSCN	obscurin, cytoskeletal calmodulin and titin-interacting RhoGEF	-1.05889	0	0.05	Down-regulated gene
STC2	stanniocalcin 2	-1.05889	0.04	0.11	Down-regulated gene
EXOSC3	exosome component 3	-1.05889	0.01	0.06	Down-regulated gene
ACTRT3	actin related protein T3	-1.05889	0	0.05	Down-regulated gene
RHCG	Rh family C glycoprotein	-1.05889	0	0.05	Down-regulated gene
DGAT2	diacylglycerol O-acyltransferase 2	-1.05889	0.01	0.07	Down-regulated gene
SLC35G1	solute carrier family 35 member G1	-1.05889	0	0.05	Down-regulated gene
CAMK1	calcium/calmodulin dependent protein kinase I	-1.05889	0	0.05	Down-regulated gene
KCNK10	potassium two pore domain channel subfamily K member 10	-1.05889	0	0.05	Down-regulated gene
DCAF15	DDB1 and CUL4 associated factor 15	-1.05889	0	0.05	Down-regulated gene
METTL10	methyltransferase like 10	-1.05889	0	0.05	Down-regulated gene
GLS2	glutaminase 2	-1.05889	0.01	0.06	Down-regulated gene
FHL2	four and a half LIM domains 2	-1.05889	0.01	0.05	Down-regulated gene
MICB	MHC class I polypeptide-related sequence B	-1.05889	0.03	0.11	Down-regulated gene
MCHR1	melanin concentrating hormone receptor 1	-1.05889	0.01	0.06	Down-regulated gene
PPM1E	protein phosphatase, Mg2+/Mn2+ dependent 1E	-1.08927	0.02	0.08	Down-regulated gene
TP53I11	"tumor protein p53 inducible protein 11	-1.08927	0.04	0.12	Down-regulated gene
KCMF1	potassium channel modulatory factor 1	-1.08927	0	0.05	Down-regulated gene
CELF4	CUGBP, Elav-like family member 4	-1.08927	0.04	0.12	Down-regulated gene
SCG2	secretogranin II	-1.08927	0.03	0.1	Down-regulated gene
SCN2B	sodium voltage-gated channel beta subunit 2	-1.08927	0.01	0.07	Down-regulated gene
VAPA	VAMP associated protein A	-1.08927	0	0.05	Down-regulated gene
CARTPT	CART prepropeptide	-1.08927	0	0.05	Down-regulated gene
NRP2	neuropilin 2	-1.08927	0	0.05	Down-regulated gene
CDC42	cell division cycle 42	-1.08927	0.03	0.11	Down-regulated gene
MIR22 /// MIR22HG	microRNA 22///MIR22 host gene	-1.08927	0.01	0.06	Down-regulated gene
BRSK2	BR serine/threonine kinase 2	-1.08927	0.01	0.06	Down-regulated gene
SPANXA1 /// SPANXA2 /// SPANXB1 /// SPANXC	SPANX family member A2///SPANX family member B1///SPANX family member C///sperm protein associated with the nucleus, X-linked, family member A1	-1.08927	0	0.05	Down-regulated gene
ATP1A3	ATPase Na+/K+ transporting subunit alpha 3	-1.08927	0.01	0.07	Down-regulated gene
SLC2A3	solute carrier family 2 member 3	-1.08927	0.01	0.06	Down-regulated gene
PLK2	polo like kinase 2	-1.12029	0.02	0.08	Down-regulated gene
HOMER2	homer scaffolding protein 2	-1.12029	0	0.05	Down-regulated gene
GFOD1	glucose-fructose oxidoreductase domain containing 1	-1.12029	0.01	0.07	Down-regulated gene
NCDN	neurochondrin	-1.12029	0.01	0.07	Down-regulated gene
GLRX	glutaredoxin 2	-1.12029	0.01	0.07	Down-regulated gene
PCOLCE2	procollagen C-endopeptidase enhancer 2	-1.12029	0	0.05	Down-regulated gene
MATN1	matrilin 1, cartilage matrix protein	-1.12029	0	0.05	Down-regulated gene
NFKBID	NFKB inhibitor delta	-1.12029	0.02	0.09	Down-regulated gene
LAMP5	lysosomal associated membrane protein family member 5	-1.12029	0.01	0.07	Down-regulated gene
LY86-AS1	LY86 antisense RNA 1	-1.12029	0.04	0.13	Down-regulated gene
RPL27A /// SNORA45A	small nucleolar RNA, H/ACA box 3A///ribosomal protein L27a	-1.12029	0.01	0.05	Down-regulated gene
SYN2	synapsin II	-1.12029	0.01	0.06	Down-regulated gene
KCNA1	potassium voltage-gated channel subfamily A member 1	-1.12029	0	0.05	Down-regulated gene
KCNJ5	potassium voltage-gated channel subfamily J member 5	-1.12029	0	0.05	Down-regulated gene
GSDMB	gasdermin B	-1.12029	0	0.05	Down-regulated gene
SLC6A3	solute carrier family 6 member 3	-1.12029	0	0.05	Down-regulated gene
CADPS	calcium dependent secretion activator	-1.12029	0.03	0.1	Down-regulated gene
ATP8A2	ATPase phospholipid transporting 8A2	-1.152	0.02	0.08	Down-regulated gene
SRGAP3	SLIT-ROBO Rho GTPase activating protein 3	-1.152	0.01	0.07	Down-regulated gene
NUP93	nucleoporin 93	-1.152	0	0.05	Down-regulated gene
TMEM155	transmembrane protein 155	-1.152	0.02	0.09	Down-regulated gene
QRICH1	glutamine rich 1	-1.152	0	0.05	Down-regulated gene
IL4I1	interleukin 4 induced 1	-1.152	0.01	0.07	Down-regulated gene
DHRS2	dehydrogenase/reductase 2	-1.152	0.01	0.07	Down-regulated gene
AFF2	AF4/FMR2 family member 2	-1.152	0	0.05	Down-regulated gene
KISS1R	KISS1 receptor	-1.152	0.02	0.08	Down-regulated gene
STRIP2	striatin interacting protein 2	-1.152	0.02	0.09	Down-regulated gene
TRPV2	transient receptor potential cation channel subfamily V member 2	-1.18442	0.01	0.06	Down-regulated gene
SGPP2	sphingosine-1-phosphate phosphatase 2	-1.18442	0	0.05	Down-regulated gene
OPRK1	opioid receptor kappa 1	-1.18442	0.03	0.1	Down-regulated gene
SLC22A8	solute carrier family 22 member 8	-1.18442	0	0.05	Down-regulated gene
SSTR2	somatostatin receptor 2	-1.18442	0.02	0.08	Down-regulated gene
SLC1A6	solute carrier family 1 member 6	-1.18442	0.02	0.09	Down-regulated gene
C14orf180	chromosome 14 open reading frame 180	-1.18442	0.01	0.06	Down-regulated gene
RIMKLA	ribosomal modification protein rimK like family member A	-1.18442	0	0.05	Down-regulated gene
KLK7	kallikrein related peptidase 7	-1.18442	0.02	0.08	Down-regulated gene
RET	ret proto-oncogene	-1.18442	0.01	0.06	Down-regulated gene
NKX2-5	NK2 homeobox 5	-1.18442	0	0.05	Down-regulated gene
ACTN1	actinin alpha 1	-1.18442	0	0.05	Down-regulated gene
SPAG11A	sperm associated antigen 11A	-1.21759	0	0.05	Down-regulated gene
LEPREL2	leprecan-like 2	-1.21759	0	0.05	Down-regulated gene
IGFBPL1	insulin like growth factor binding protein like 1	-1.21759	0	0.05	Down-regulated gene
FABP3	fatty acid binding protein 3	-1.21759	0.01	0.05	Down-regulated gene
MAGEL2	MAGE family member L2	-1.21759	0	0.05	Down-regulated gene
PPP1R17	protein phosphatase 1 regulatory subunit 17	-1.25154	0.01	0.06	Down-regulated gene
IL12RB1	interleukin 12 receptor subunit beta 1	-1.25154	0.02	0.08	Down-regulated gene
SYT2	synaptotagmin 2	-1.25154	0.01	0.05	Down-regulated gene
SNORD114-3	small nucleolar RNA, C/D box 114-3	-1.25154	0	0.05	Down-regulated gene
AFF3	AF4/FMR2 family member 3	-1.25154	0	0.05	Down-regulated gene
PCDH20	protocadherin 20	-1.2863	0.03	0.1	Down-regulated gene
LRRFIP1	LRR binding FLII interacting protein 1	-1.2863	0.02	0.08	Down-regulated gene
LINC00622	long intergenic non-protein coding RNA 622	-1.2863	0	0.05	Down-regulated gene
L3MBTL1	l(3)mbt-like 1 (Drosophila)	-1.2863	0	0.05	Down-regulated gene
PYCRL	pyrroline-5-carboxylate reductase-like	-1.2863	0.01	0.06	Down-regulated gene
TBC1D26 /// ZNF286A	TBC1 domain family, member 26 /// zinc finger protein 286A	-1.2863	0.01	0.05	Down-regulated gene
ATF7IP2	"activating transcription factor 7 interacting protein 2"	-1.32193	0.02	0.09	Down-regulated gene
PWP2	PWP2 periodic tryptophan protein homolog (yeast)"	-1.32193	0	0.05	Down-regulated gene
CACNA1A	calcium voltage-gated channel subunit alpha1 A	-1.32193	0.01	0.05	Down-regulated gene
KCNJ4	potassium voltage-gated channel subfamily J member 4	-1.32193	0.03	0.11	Down-regulated gene
TRHDE	thyrotropin releasing hormone degrading enzyme	-1.32193	0.04	0.12	Down-regulated gene
SUSD4	sushi domain containing 4	-1.32193	0.01	0.07	Down-regulated gene
UBASH3B	ubiquitin associated and SH3 domain containing B	-1.35845	0	0.05	Down-regulated gene
SIAH1	siah E3 ubiquitin protein ligase 1	-1.35845	0	0.05	Down-regulated gene
PTH2R	parathyroid hormone 2 receptor	-1.35845	0.03	0.1	Down-regulated gene
SDK1	sidekick cell adhesion molecule 1	-1.35845	0.02	0.08	Down-regulated gene
CCNJL	cyclin J like	-1.35845	0.03	0.1	Down-regulated gene
KCNQ5	potassium voltage-gated channel subfamily Q member 5	-1.35845	0.02	0.08	Down-regulated gene
TMEM61	transmembrane protein 61	-1.39593	0	0.05	Down-regulated gene
PML	promyelocytic leukemia	-1.39593	0	0.05	Down-regulated gene
NRIP3	nuclear receptor interacting protein 3	-1.39593	0.01	0.07	Down-regulated gene
METTL7B	methyltransferase like 7B	-1.39593	0	0.05	Down-regulated gene
LINC00282	long intergenic non-protein coding RNA 282	-1.39593	0.02	0.08	Down-regulated gene
WIPF3	WAS/WASL interacting protein family member 3	-1.4344	0.02	0.09	Down-regulated gene
CLSTN2	calsyntenin 2	-1.4344	0	0.05	Down-regulated gene
GREM2	gremlin 2, DAN family BMP antagonist	-1.47393	0.01	0.07	Down-regulated gene
LOC389906	zinc finger protein 839 pseudogene	-1.47393	0.04	0.13	Down-regulated gene
IFRD1	interferon related developmental regulator 1	-1.47393	0.01	0.07	Down-regulated gene
MRAP2	melanocortin 2 receptor accessory protein 2	-1.47393	0.03	0.1	Down-regulated gene
CENPVP1 /// CENPVP2	centromere protein V pseudogene 1 /// centromere protein V pseudogene 2	-1.47393	0	0.05	Down-regulated gene
KCNIP2	"potassium voltage-gated channel interacting protein 2	-1.51457	0.01	0.07	Down-regulated gene
KDM6B	lysine demethylase 6B	-1.51457	0.04	0.13	Down-regulated gene
CTSG	cathepsin G	-1.51457	0	0.05	Down-regulated gene
KMT2D	lysine methyltransferase 2D	-1.51457	0	0.05	Down-regulated gene
CPNE4	copine 4	-1.55639	0.01	0.05	Down-regulated gene
PGM5	phosphoglucomutase 5	-1.55639	0.04	0.12	Down-regulated gene
CARD14	caspase recruitment domain family member 14	-1.55639	0	0.05	Down-regulated gene
CST7	cystatin F (leukocystatin)	-1.55639	0	0.05	Down-regulated gene
SPOCD1	"SPOC domain containing 1	-1.59946	0.02	0.08	Down-regulated gene
HINT3	histidine triad nucleotide binding protein 3	-1.59946	0.01	0.06	Down-regulated gene
NR4A3	nuclear receptor subfamily 4 group A member 3	-1.59946	0.01	0.06	Down-regulated gene
CENPW	centromere protein W	-1.64386	0	0.05	Down-regulated gene
VEGFA	vascular endothelial growth factor A	-1.64386	0.02	0.09	Down-regulated gene
PCDH8	protocadherin 8	-1.64386	0.01	0.07	Down-regulated gene
PKIB	protein kinase (cAMP-dependent, catalytic) inhibitor beta	-1.68966	0	0.05	Down-regulated gene
DNAJB5	DnaJ heat shock protein family (Hsp40) member B5	-1.73697	0	0.05	Down-regulated gene
ARC	activity regulated cytoskeleton associated protein	-1.78588	0.03	0.1	Down-regulated gene
GRP	gastrin releasing peptide	-1.8365	0	0.05	Down-regulated gene
CKS2	CDC28 protein kinase regulatory subunit 2	-1.8365	0.04	0.11	Down-regulated gene
PTGS1	prostaglandin-endoperoxide synthase 1	-1.8365	0.03	0.1	Down-regulated gene
ARHGAP36	Rho GTPase activating protein 36	-1.88897	0.01	0.07	Down-regulated gene
A1BG	alpha-1-B glycoprotein	-1.88897	0	0.05	Down-regulated gene
RTF1	RTF1 homolog, Paf1/RNA polymerase II complex component	-1.88897	0	0.05	Down-regulated gene
AQP3	aquaporin 3 (Gill blood group)	-1.88897	0.01	0.06	Down-regulated gene
TSPAN18	tetraspanin 18	-1.88897	0.02	0.08	Down-regulated gene
TH	tyrosine hydroxylase	-1.94342	0	0.05	Down-regulated gene
CHGB	chromogranin B	-1.94342	0.01	0.05	Down-regulated gene
CITED1	Cbp/p300 interacting transactivator with Glu/Asp rich carboxy-terminal domain 1	-2	0	0.05	Down-regulated gene
CALB1	calbindin 1	-2.05889	0	0.05	Down-regulated gene
CRABP1	cellular retinoic acid binding protein 1	-2.12029	0	0.05	Down-regulated gene
MIR7-3HG	MIR7-3 host gene	-2.12029	0	0.05	Down-regulated gene
PDYN	prodynorphin	-2.25154	0.01	0.06	Down-regulated gene
FNDC9	fibronectin type III domain containing 9	-2.47393	0.02	0.08	Down-regulated gene
SCGN	secretag ogin, EF-hand calcium binding protein	-2.47393	0.02	0.09	Down-regulated gene
WFIKKN2	WAP, follistatin/kazal, immunoglobulin, kunitz and netrin domain containing 2	-2.8365	0	0.05	Down-regulated gene
BDNF	brain derived neurotrophic factor	-2.94342	0	0.05	Down-regulated gene
RAE1	ribonucleic acid export 1	-2.94342	0	0.05	Down-regulated gene
INHBA	inhibin beta A subunit	-3.18442	0	0.05	Down-regulated gene
EGR4	early growth response 4	-3.18442	0	0.05	Down-regulated gene
FOSB	FosB proto-oncogene, AP-1 transcription factor subunit	-3.18442	0.01	0.06	Down-regulated gene
LAMB3	laminin subunit beta 3	-3.32193	0.01	0.07	Down-regulated gene
EGR2	early growth response 2	-3.47393	0.03	0.11	Down-regulated gene
MPO	myeloperoxidase	-5.05889	0	0.05	Down-regulated gene
NPAS4	neuronal PAS domain protein 4	-6.64386	0.03	0.1	Down-regulated gene
Entorhinal cortex
Gene symbol	Gene title	logFC	P value	False discovery rate	Category
ANKIB1	ankyrin repeat and IBR domain containing 1	5.02154	0.00199601	0.231702	Up-regulated gene
TAC1	tachykinin precursor 1	4.08703	0.00199601	0.231702	Up-regulated gene
SLC25A46	solute carrier family 25 member 46	3.67258	0.00199601	0.231702	Up-regulated gene
XIST	X inactive specific transcript (non-protein coding)	2.86583	0.00399202	0.289474	Up-regulated gene
ZNF621	zinc finger protein 621	2.72344	0.00199601	0.231702	Up-regulated gene
C1orf192	chromosome 1 open reading frame 192	1.63239	0.0319361	0.337594	Up-regulated gene
SPATA13	spermatogenesis associated 13	1.48645	0.00998004	0.337594	Up-regulated gene
PKP2	plakophilin 2	1.10648	0.0499002	0.348842	Up-regulated gene
CDK19	cyclin dependent kinase 19	1.10169	0.00199601	0.231702	Up-regulated gene
A2ML1	alpha-2-macroglobulin like 1	1.08195	0.00399202	0.289474	Up-regulated gene
CX3CR1	C-X3-C motif chemokine receptor 1	1.07553	0.0319361	0.337594	Up-regulated gene
C1orf87	chromosome 1 open reading frame 87	1.06389	0.0279441	0.337594	Up-regulated gene
RAPGEF5	Rap guanine nucleotide exchange factor 5	1.04598	0.0159681	0.337594	Up-regulated gene
CD24	CD24 molecule	1.04255	0.0259481	0.337594	Up-regulated gene
ID2 /// ID2B	inhibitor of DNA binding 2, dominant negative helix-loop-helix protein /// inhibitor of DNA binding 2B, dominant negative helix-loop-helix protein (pseudogene)	1.03253	0.0259481	0.337594	Up-regulated gene
DST	dystonin	1.03102	0.00598802	0.328051	Up-regulated gene
RIT2	Ras like without CAAX 2	-1.01398	0.0319361	0.337594	Down-regulated gene
SLC17A6	solute carrier family 17 member 6	-1.01875	0.0319361	0.337594	Down-regulated gene
POPDC3	popeye domain containing 3	-1.01893	0.00199601	0.231702	Down-regulated gene
RPLP2P1 /// RPLP2P1	ribosomal protein, large P2, pseudogene 1 ///	-1.02122	0.00199601	0.231702	Down-regulated gene
NEFH	neurofilament heavy polypeptide	-1.02399	0.0139721	0.337594	Down-regulated gene
CKS2	CDC28 protein kinase regulatory subunit 2	-1.02429	0.0199601	0.337594	Down-regulated gene
LRRFIP1	LRR binding FLII interacting protein 1	-1.02825	0.0139721	0.337594	Down-regulated gene
CYP27C1	cytochrome P450 family 27 subfamily C member 1	-1.03007	0.0159681	0.337594	Down-regulated gene
CABP1	calcium binding protein 1	-1.0416	0.0139721	0.337594	Down-regulated gene
SCGB3A1	secretoglobin family 3A member 1	-1.04861	0.00598802	0.328051	Down-regulated gene
LY86-AS1	LY86 antisense RNA 1	-1.07385	0.0159681	0.337594	Down-regulated gene
VASH2	vasohibin 2	-1.07518	0.0199601	0.337594	Down-regulated gene
QPCT	glutaminyl-peptide cyclotransferase	-1.09266	0.00998004	0.337594	Down-regulated gene
CENPF	centromere protein F	-1.09827	0.0199601	0.337594	Down-regulated gene
MPP7	membrane palmitoylated protein 7	-1.12027	0.0219561	0.337594	Down-regulated gene
TWIST2	twist family bHLH transcription factor 2	-1.12482	0.00199601	0.231702	Down-regulated gene
COL4A1	collagen type IV alpha 1 chain	-1.1369	0.0359281	0.337594	Down-regulated gene
TCERG1L	transcription elongation regulator 1 like	-1.17023	0.0279441	0.337594	Down-regulated gene
RGS2	regulator of G-protein signaling 2	-1.20609	0.0419162	0.340227	Down-regulated gene
HSPB3	heat shock protein family B (small) member 3	-1.25757	0.0139721	0.337594	Down-regulated gene
ANKRD34C	ankyrin repeat domain 34C	-1.26974	0.00998004	0.337594	Down-regulated gene
OTP	orthopedia homeobox	-1.28153	0.00199601	0.231702	Down-regulated gene
KDELR3	KDEL endoplasmic reticulum protein retention receptor 3	-1.28515	0.0199601	0.337594	Down-regulated gene
TPSAB1	tryptase alpha/beta 1	-1.30093	0.00399202	0.289474	Down-regulated gene
BRE-AS1	BRE antisense RNA 1	-1.3305	0.00399202	0.289474	Down-regulated gene
CARTPT	CART prepropeptide	-1.33822	0.00998004	0.337594	Down-regulated gene
SECTM1	secreted and transmembrane 1	-1.3541	0.0259481	0.337594	Down-regulated gene
XIRP1	xin actin binding repeat containing 1	-1.37043	0.00598802	0.328051	Down-regulated gene
IL1RL1	interleukin 1 receptor like 1	-1.38021	0.0319361	0.337594	Down-regulated gene
GPR68	G protein-coupled receptor 68	-1.38755	0.0379242	0.337594	Down-regulated gene
MMP10	matrix metallopeptidase 10	-1.41614	0.00399202	0.289474	Down-regulated gene
TPSB2	tryptase beta 2 (gene/pseudogene)	-1.44947	0.00998004	0.337594	Down-regulated gene
DUSP2	dual specificity phosphatase 26 (putative)	-1.46558	0.0379242	0.337594	Down-regulated gene
RSPO2	R-spondin 2	-1.48478	0.00598802	0.328051	Down-regulated gene
PTGS2	prostaglandin-endoperoxide synthase 2	-1.50901	0.0359281	0.337594	Down-regulated gene
RTF1	RTF1 homolog, Paf1/RNA polymerase II complex component	-1.55615	0.00199601	0.231702	Down-regulated gene
IL7R	interleukin 7 receptor	-1.6093	0.00199601	0.231702	Down-regulated gene
GPR3	G protein-coupled receptor 3	-1.61509	0.00199601	0.231702	Down-regulated gene
FOSL1	FOS like 1, AP-1 transcription factor subunit	-1.6231	0.00798403	0.337594	Down-regulated gene
LINC00622	long intergenic non-protein coding RNA 622	-1.62879	0.00998004	0.337594	Down-regulated gene
IL11	interleukin 11	-1.65792	0.00399202	0.289474	Down-regulated gene
DHRS2	dehydrogenase/reductase 2	-1.68815	0.0319361	0.337594	Down-regulated gene
FOSB	FosB proto-oncogene, AP-1 transcription factor subunit	-1.69368	0.0279441	0.337594	Down-regulated gene
CBLN1	cerebellin 1 precursor	-1.83172	0.0259481	0.337594	Down-regulated gene
SAA1 /// SAA2	serum amyloid A1///serum amyloid A2	-1.85873	0.0299401	0.337594	Down-regulated gene
C2CD4A	C2 calcium dependent domain containing 4A	-1.91101	0.00399202	0.289474	Down-regulated gene
SPOCD1	"SPOC domain containing 1	-1.95395	0.00399202	0.289474	Down-regulated gene
TGFBI	transforming growth factor beta induced	-1.98695	0.0499002	0.348842	Down-regulated gene
HDC	histidine decarboxylase	-2.21328	0.00399202	0.289474	Down-regulated gene
HS3ST2	heparan sulfate-glucosamine 3-sulfotransferase 2	-2.21748	0.0139721	0.337594	Down-regulated gene
LINC00960	long intergenic non-protein coding RNA 960	-2.26401	0.00199601	0.231702	Down-regulated gene
ATP1B4	ATPase Na+/K+ transporting family member beta 4	-2.41498	0.00798403	0.337594	Down-regulated gene
RAE1	ribonucleic acid export 1	-2.77285	0.00199601	0.231702	Down-regulated gene
PMCH	pro-melanin concentrating hormone	-3.45159	0.00199601	0.231702	Down-regulated gene
LAMB3	laminin subunit beta 3	-4.07613	0.00399202	0.289474	Down-regulated gene
OXT	oxytocin/neurophysin I prepropeptide	-4.10352	0.00199601	0.231702	Down-regulated gene
INHBA	inhibin beta A subunit	-4.85851	0.0299401	0.337594	Down-regulated gene
AVP	arginine vasopressin	-7.11453	0.00199601	0.231702	Down-regulated gene
