# Supplementary material for: Integrated identification of key genes and pathways in Alzheimer’s disease via comprehensive bioinformatical analyses
Source: Hereditas. 2019 Jul 16;156:25. doi: 10.1186/s41065-019-0101-0 (PMC6636172; doi:10.1186/s41065-019-0101-0)
Supplement: Supplementary file 4 — Table S4. Information for cellular component analysis of DEGs from hippocampus. Included detailed information of results of cellular component analysis of DEGs from hippocampus. (XLSX 21 kb) [file 41065_2019_101_MOESM4_ESM.xlsx]

## Sheet: ClueGOResults1 NodeAttributeTab
Additional file 4: Table S4 Information for cellular component analysis of DEGs from hippocampus
GO ID	GO Term	GO Levels	GO Groups	Genes Number	% Associated Genes	Term P Value	Term P Value Corrected with Bonferroni step down	Group P Value	Group P Value Corrected with Bonferroni step down	Associated Genes Found	All Associated Genes	Over View Term
GO:0098794	postsynapse	[2, 3]	[Group0]	30	4.04313	3.579e-09	8.5896e-08	{Group0=3.57899876795426E-9}	{Group0=2.505299137567982E-8}	[ANK1, ARC, ARHGEF7, ATP1A3, BSN, CACNA1A, CALB1, CALY, CAMK1, CARD14, CDC42, CLSTN2, CST7, DNAAF3, GABRG2, HOMER2, KALRN, KCNA1, KCNC1, KCNJ4, NEFH, NPAS4, NRP1, NRP2, OPRK1, PCDH8, PCLO, SLC6A3, SRGAP3, SYN2]	[ABCB6, ABHD17A, ABHD17B, ABHD17C, ABHD6, ABI1, ABI2, ABL1, ACP4, ACTB, ACTN2, ACTR2, ACTRT1, ADAM10, ADAM22, ADCY1, ADD2, ADD3, ADGRA1, ADGRB1, ADGRB3, ADORA1, ADORA2A, ADORA2B, ADRA1A, ADRA1D, ADRA2C, ADRB1, AGER, AICDA, AKAP9, AKT1, ALPL, ALS2, ANGPTL2, ANK1, ANK2, ANK3, ANKH, ANKK1, ANKS1B, ANPEP, AP2B1, AP2M1, AP3B1, APBB1, APP, ARC, ARF1, ARF1P1, ARF4, ARFGAP1, ARFGAP3, ARFGEF2, ARHGAP32, A…	TRUE
GO:0014704	intercalated disc	[4]	[Group1]	3	4.7619	0.0380271	0.0380271	{Group1=0.03802707998132741}	{Group1=0.03802707998132741}	[ACTN1, ATP1A3, PGM5]	[ACTN1, AKAP6, ANK2, ANK3, ANKRD23, APC, ATP1A1, ATP1A2, ATP1A3, ATP1A4, ATP1B1, CAPZB, CAV3, CDH2, CNC2, CTNNA1, CTNNA3, DES, DLG1, DSC2, DSC3, DSG2, DSP, DSPP, ELANE, FGF13, FHOD1, FXYD1, GJA1, GJA5, GJC1, GJD3, HAMP, ITGB1, JUP, KCNA5, KCNJ11, KCNJ2, MYH1, NACC1, NOL6, NRAP, OBSL1, PAK1, PGM5, PKN1, PKP2, PRKAR1A, RANGRF, SCN1A, SCN1B, SCN2A, SCN4B, SCN5A, SLC2A1, SLC8A1, SLC9A1, SPTBN4, TJP1,…	TRUE
GO:0031430	M band	[3, 4, 5, 6, 7, 8, 9, 10, 11]	[Group2]	3	9.375	0.00618499	0.0309249	{Group2=0.006184986943966409}	{Group2=0.012369973887932819}	[ANK1, FHL2, OBSCN]	[ALDOA, ANK1, ANK2, ANKH, CMYA5, CRYAB, ENO1, FHL2, IGSF22, KCTD6, KLHL41, LMOD2, LMOD3, LRRC39, MYBPC1, MYBPC2, MYBPC3, MYBPH, MYBPHL, MYOM1, MYOM2, MYOM3, NBR1, OBSCN, OBSL1, PPP2R5A, S100A1, SMPX, SMTNL1, SPTBN1, TRIM63, TTN]	TRUE
GO:0034703	cation channel complex	[5, 6, 7]	[Group3]	11	4.4	0.000190369	0.00380738	{Group3=1.9036898805106884E-4}	{Group3=7.614759522042753E-4}	[CACNA1A, KCNA1, KCNC1, KCNG3, KCNIP2, KCNJ4, KCNJ5, KCNJ6, KCNQ5, SCN2B, SCNN1G]	[ABCC8, ABCC9, ABHD12, ABHD6, AKAP6, AKAP9, AMIGO1, ARHGEF40, ATP2A1, CACNA1A, CACNA1B, CACNA1C, CACNA1D, CACNA1E, CACNA1F, CACNA1G, CACNA1H, CACNA1I, CACNA1S, CACNA2D1, CACNA2D2, CACNA2D4, CACNB1, CACNB2, CACNB3, CACNB4, CACNG1, CACNG2, CACNG3, CACNG4, CACNG5, CACNG6, CACNG7, CACNG8, CALM1, CALM2, CALM3, CAMK2B, CASQ2, CATSPER1, CATSPER2, CATSPER3, CATSPER4, CATSPERB, CATSPERD, CATSPERE, CATSPER…	FALSE
GO:0008076	voltage-gated potassium channel complex	[4, 5, 6, 7, 8, 9]	[Group3]	8	8	2.36761e-05	0.00054455	{Group3=1.9036898805106884E-4}	{Group3=7.614759522042753E-4}	[KCNA1, KCNC1, KCNG3, KCNIP2, KCNJ4, KCNJ5, KCNJ6, KCNQ5]	[AKAP9, AMIGO1, CALM1, CALM2, CALM3, CAMK2B, CNTN2, CNTNAP1, CNTNAP2, CTTN, CUZD1, DKK1, DLG2, DLG4, DPP10, DPP6, ERG, HCN1, HCN2, HCN4, IKZF1, KCNA1, KCNA10, KCNA2, KCNA3, KCNA4, KCNA5, KCNA6, KCNA7, KCNAB1, KCNAB2, KCNB1, KCNB2, KCNC1, KCNC2, KCNC3, KCNC4, KCND1, KCND2, KCND3, KCNE1, KCNE2, KCNE3, KCNE5, KCNF1, KCNG1, KCNG2, KCNG3, KCNG4, KCNH1, KCNH2, KCNH4, KCNIP1, KCNIP2, KCNIP3, KCNIP4, KCN…	TRUE
GO:0034705	potassium channel complex	[6, 7, 8]	[Group3]	8	7.40741	4.13312e-05	0.000909285	{Group3=1.9036898805106884E-4}	{Group3=7.614759522042753E-4}	[KCNA1, KCNC1, KCNG3, KCNIP2, KCNJ4, KCNJ5, KCNJ6, KCNQ5]	[ABCC8, ABCC9, AKAP9, AMIGO1, CALM1, CALM2, CALM3, CAMK2B, CNTN2, CNTNAP1, CNTNAP2, CTTN, CUZD1, DKK1, DLG2, DLG4, DPP10, DPP6, ERG, GRIK2, GRIK4, GRIK5, HCN1, HCN2, HCN4, IKZF1, KCNA1, KCNA10, KCNA2, KCNA3, KCNA4, KCNA5, KCNA6, KCNA7, KCNAB1, KCNAB2, KCNB1, KCNB2, KCNC1, KCNC2, KCNC3, KCNC4, KCND1, KCND2, KCND3, KCNE1, KCNE2, KCNE3, KCNE5, KCNF1, KCNG1, KCNG2, KCNG3, KCNG4, KCNH1, KCNH2, KCNH4, …	FALSE
GO:0008021	synaptic vesicle	[2, 3, 4, 5, 6, 7, 8, 9, 10]	[Group4]	9	4.2654	0.000904715	0.0108566	{Group4=9.04714821986679E-4}	{Group4=0.002714144465960037}	[AMPH, BRSK2, LAMP5, OPRK1, RAB3C, STON2, SYN2, SYT2, TH]	[ABCC8, AMPH, ANKK1, APBA1, APBA2, APEX1, ATP6V0D1, ATP6V1B1, ATP6V1B2, ATP6V1C1, ATP6V1G1, ATP6V1G2, BCL2L1, BRSK1, BRSK2, BTBD8, CALM1, CALM3, CBARP, CDK16, CLCN3, CLN3, CLTA, CLTB, COPS4, COPS5, CPLX3, CRMP1, CTTNBP2, DAPK2, DBNDD1, DBNDD2, DDC, DENR, DGKI, DLG4, DMD, DMXL2, DNAJC5, DNM1, DNM1L, DOC2A, DRD2, DTNBP1, ECD, GABRA2, GAD2, GIPC1, GPRIN1, GRIA1, GRIN1, GRIN2A, HAP1, HCRT, ICA1, KCNK…	TRUE
GO:0030672	synaptic vesicle membrane	[2, 3, 4, 5, 6, 7, 8, 9, 10, 11, 12]	[Group4]	6	4.87805	0.0033513	0.0268104	{Group4=9.04714821986679E-4}	{Group4=0.002714144465960037}	[AMPH, LAMP5, OPRK1, RAB3C, SYN2, SYT2]	[ABCC8, AMPH, ANKK1, ATP6V1B1, ATP6V1B2, ATP6V1G1, ATP6V1G2, BCL2L1, CALM1, CALM3, CBARP, CLTA, CLTB, CPLX3, CRMP1, DAPK2, DBNDD1, DBNDD2, DENR, DMD, DMXL2, DNAJC5, DNM1L, DOC2A, DRD2, DTNBP1, ECD, GABRA2, GAD2, ICA1, KRIT1, LAMP1, LAMP5, LRRK2, MAL2, MCTP1, OPRD1, OPRK1, OR13F1, OR56A1, OR56A4, OR56A5, OR5T1, OTOF, PDSS2, PI4K2A, PICALM, PRRT2, PTPRN2, PTPRS, RAB11B, RAB1C, RAB26, RAB27B, RAB35,…	FALSE
GO:0099501	exocytic vesicle membrane	[4, 5, 6, 7, 8, 9, 10, 11]	[Group4]	6	4.87805	0.0033513	0.0268104	{Group4=9.04714821986679E-4}	{Group4=0.002714144465960037}	[AMPH, LAMP5, OPRK1, RAB3C, SYN2, SYT2]	[ABCC8, AMPH, ANKK1, ATP6V1B1, ATP6V1B2, ATP6V1G1, ATP6V1G2, BCL2L1, CALM1, CALM3, CBARP, CLTA, CLTB, CPLX3, CRMP1, DAPK2, DBNDD1, DBNDD2, DENR, DMD, DMXL2, DNAJC5, DNM1L, DOC2A, DRD2, DTNBP1, ECD, GABRA2, GAD2, ICA1, KRIT1, LAMP1, LAMP5, LRRK2, MAL2, MCTP1, OPRD1, OPRK1, OR13F1, OR56A1, OR56A4, OR56A5, OR5T1, OTOF, PDSS2, PI4K2A, PICALM, PRRT2, PTPRN2, PTPRS, RAB11B, RAB1C, RAB26, RAB27B, RAB35,…	FALSE
GO:0031256	leading edge membrane	[3, 4, 5, 6]	[Group5]	10	4.46429	0.000331124	0.00596023	{Group5=1.5967738878620684E-4}	{Group5=7.983869439310341E-4}	[AMPH, ANK1, CACNA1A, CD44, CDC42, GABRG2, KCNC1, LAMP5, PDPN, SYNE2]	[ABCA7, ABHD14B, ACOT8, ADAM17, ADGRE2, ADORA1, ADORA2A, ADORA2B, AIF1, AIF1L, AKT2, AMPH, ANAPC2, ANK1, ANKH, ANTXR1, APC, APC2, ARF4, ARHGAP44, ARHGAP45, ARHGEF2, ARHGEF4, ARNTL, ATF2, ATF4, ATP2B1, ATR, AZI2, BDH2, BMX, C2CD5, CACNA1A, CD44, CD8A, CDC42, CDKL5, CEL, CFL1, CIB1, CLASP2, CLEC11A, CNTNAP2, CSPG4, CTPP, CXCL8, DDN, DDX58, DIAPH1, DLC1, DLEC1, DLG2, DNM2, DOCK8, DPP4, DRC3, DYNLL1,…	TRUE
GO:0044298	cell body membrane	[3, 4, 5, 6]	[Group5]	3	9.67742	0.00565356	0.0339214	{Group5=1.5967738878620684E-4}	{Group5=7.983869439310341E-4}	[ATP1A3, CACNA1A, KCNC1]	[ABI2, ACTRT1, AMIGO1, ARL6IP1, ATP1A3, ATP2B1, BIRC3, CACNA1A, CD22, CX3CR1, DAB2IP, FLRT1, GABRA5, HPCA, INSR, KCNA2, KCNB1, KCNB2, KCNC1, KCNC2, KCND2, KCNE3, MAGI2, PDCD6IP, RGS8, SLC4A7, SLC4A8, TACR3, THY1, UNC5A, WDR1]	FALSE
GO:0032809	neuronal cell body membrane	[3, 4, 5, 6, 7]	[Group5]	3	9.67742	0.00565356	0.0339214	{Group5=1.5967738878620684E-4}	{Group5=7.983869439310341E-4}	[ATP1A3, CACNA1A, KCNC1]	[ABI2, ACTRT1, AMIGO1, ARL6IP1, ATP1A3, ATP2B1, BIRC3, CACNA1A, CD22, CX3CR1, DAB2IP, FLRT1, GABRA5, HPCA, INSR, KCNA2, KCNB1, KCNB2, KCNC1, KCNC2, KCND2, KCNE3, MAGI2, PDCD6IP, RGS8, SLC4A7, SLC4A8, TACR3, THY1, UNC5A, WDR1]	FALSE
GO:0032589	neuron projection membrane	[3, 4, 5, 6, 7, 8]	[Group5]	5	8.77193	0.000546895	0.00820343	{Group5=1.5967738878620684E-4}	{Group5=7.983869439310341E-4}	[ANK1, CACNA1A, GABRG2, KCNC1, LAMP5]	[ADORA1, ADORA2A, ADORA2B, ANK1, ANKH, ATF2, ATF4, ATP2B1, CACNA1A, CNTNAP2, DDN, DLG2, EPB41L3, FOXM1, GABARAPL1, GABRG2, GPER1, GRIA1, HPCA, INSR, ITGA8, KCNC1, KCNC2, KCNC3, KCNJ11, LAMP5, LIPF, LLGL2, MAPK8IP3, MAPT, MDH2, MPP2, MYO1C, MYO1D, MYO1E, NRG1, OPRD1, OPRM1, PALM, PPP1R9B, RIPOR2, ROBO2, SGCE, SHISA9, SLC1A2, SPTBN1, TACR3, THY1, TLE1, TLE2, TLE3, TLE4, TRPV1, UNC5A, USH2A, VTRNA1-…	FALSE
GO:0032590	dendrite membrane	[4, 5, 6, 7, 8, 9]	[Group5]	4	11.7647	0.0006539	0.00915461	{Group5=1.5967738878620684E-4}	{Group5=7.983869439310341E-4}	[CACNA1A, GABRG2, KCNC1, LAMP5]	[ATF2, ATF4, ATP2B1, CACNA1A, DDN, DLG2, FOXM1, GABARAPL1, GABRG2, GPER1, GRIA1, HPCA, INSR, ITGA8, KCNC1, KCNC3, LAMP5, MDH2, MPP2, OPRD1, OPRM1, PALM, PPP1R9B, SGCE, SHISA9, TACR3, THY1, TLE1, TLE2, TLE3, TLE4, TRPV1, VTRNA1-1, WLS]	FALSE
GO:0044306	neuron projection terminus	[3, 4, 5, 6]	[Group6]	7	4.40252	0.00278974	0.0251076	{Group6=6.197278421183853E-5}	{Group6=3.718367052710312E-4}	[BSN, CALB1, KCNA1, KCNC1, OPRK1, PDYN, TH]	[AAK1, ACOD1, ACTB, ACTG1, ADCYAP1, ADORA1, ADRA2C, ANKK1, AP1S1, ATP6V0D1, ATP6V1C1, BAIAP2, BLVRB, BSN, BTBD8, CABP4, CAD, CALB1, CALCA, CASR, CCK, CDH8, CHRM1, CHRM2, CHRM3, CNGB1, CPLX1, CPLX2, CRHBP, CYFIP1, DFFB, DGKI, DLG4, DMD, DPYSL2, DRD2, ELK1, EPHA4, FKBP1A, FKBP1AP1, FKBP1AP2, FKBP1AP3, FKBP1AP4, FLRT1, FLRT3, FMR1, FMR1-IT1, FRAXA, FSTL3, GAD1, GCH1, GHRH, GIT1, GLRA1, GLUL, GNRH1, …	FALSE
GO:0099240	intrinsic component of synaptic membrane	[2, 3, 4, 5, 6, 7, 8]	[Group6]	10	4.71698	0.000213147	0.00404979	{Group6=6.197278421183853E-5}	{Group6=3.718367052710312E-4}	[CLSTN2, CNR1, KCNA1, KCNC1, NRP1, NRP2, OPRK1, PCDH8, SLC1A6, SLC6A3]	[ABHD17A, ABHD17B, ABHD6, ADAM22, ADAM23, ADCY1, ADCY8, ADORA1, ADORA2A, ADORA2B, ADRA1A, ADRA1D, ADRA2C, ADRB1, ANKK1, ATP2B1, ATP2B2, ATP2B4, CACNA1D, CACNG2, CACNG3, CACNG4, CACNG5, CACNG7, CADM3, CANX, CCT6A, CDH10, CDH9, CHRM1, CHRM2, CHRM3, CHRNA1, CHRNA10, CHRNA4, CHRNA6, CHRNA9, CHRNB1, CHRNB2, CHRND, CHRNE, CLSTN1, CLSTN2, CLSTN3, CNC2, CNIH1, CNIH2, CNIH4, CNR1, CNTN1, CNTN2, CNTN5, CNT…	FALSE
GO:0043679	axon terminus	[3, 4, 5, 6, 7, 8, 9]	[Group6]	6	4.41176	0.00546851	0.0382796	{Group6=6.197278421183853E-5}	{Group6=3.718367052710312E-4}	[CALB1, KCNA1, KCNC1, OPRK1, PDYN, TH]	[AAK1, ACOD1, ACTB, ACTG1, ADCYAP1, ADORA1, ADRA2C, ANKK1, AP1S1, ATP6V0D1, ATP6V1C1, BLVRB, CABP4, CAD, CALB1, CALCA, CASR, CCK, CDH8, CHRM1, CHRM2, CHRM3, CNGB1, CPLX1, CPLX2, CRHBP, CYFIP1, DFFB, DGKI, DPYSL2, DRD2, ELK1, EPHA4, FKBP1A, FKBP1AP1, FKBP1AP2, FKBP1AP3, FKBP1AP4, FLRT3, FMR1, FMR1-IT1, FRAXA, GAD1, GHRH, GIT1, GLRA1, GLUL, GNRH1, GOLT1A, GOLT1B, GOT1, GPER1, GPRIN1, GRIK2, GRIK3, …	FALSE
GO:0098889	intrinsic component of presynaptic membrane	[3, 4, 5, 6, 7, 8, 9]	[Group6]	6	5.88235	0.0013009	0.01431	{Group6=6.197278421183853E-5}	{Group6=3.718367052710312E-4}	[CNR1, KCNA1, KCNC1, OPRK1, SLC1A6, SLC6A3]	[ADAM23, ADCY8, ADORA1, ADORA2A, ADORA2B, ADRA1A, ADRA1D, ANKK1, ATP2B1, ATP2B2, ATP2B4, CACNA1D, CADM3, CANX, CCT6A, CDH10, CDH9, CHRM1, CHRM2, CHRM3, CHRNA4, CHRNA6, CHRNB2, CNR1, CNTN1, CNTN5, CNTN6, CNTNAP4, CPLX3, DHRS3, DRD1, DRD2, EFNB3, EPHA4, EPHB2, ERBB4, FLOT2, GABRA5, GGTA1P, GLRA1, GPC4, GPM6A, GRIK2, GRIK4, GRIK5, GRM3, HTR1B, HTR2A, HTR3A, HTT, KAT5, KCNA1, KCNA2, KCNA3, KCNC1, KCN…	FALSE
GO:0098936	intrinsic component of postsynaptic membrane	[3, 4, 5, 6, 7, 8, 9]	[Group6]	8	5.16129	0.000504361	0.00806978	{Group6=6.197278421183853E-5}	{Group6=3.718367052710312E-4}	[CLSTN2, KCNA1, KCNC1, NRP1, NRP2, OPRK1, PCDH8, SLC6A3]	[ABHD17A, ABHD17B, ABHD6, ADAM22, ADCY1, ADORA1, ADORA2A, ADORA2B, ADRA1A, ADRA1D, ADRA2C, ADRB1, ANKK1, CACNG2, CACNG3, CACNG4, CACNG5, CACNG7, CANX, CCT6A, CDH10, CDH9, CHRM1, CHRM2, CHRM3, CHRNA1, CHRNA10, CHRNA6, CHRNA9, CHRNB1, CHRNB2, CHRND, CHRNE, CLSTN1, CLSTN2, CLSTN3, CNC2, CNIH1, CNIH2, CNIH4, CNTN1, CNTN2, CSPG5, DAGLA, DCC, DHRS3, DRD1, DRD2, DRD3, EFNB3, EPHA4, EPHA7, EPHB2, ERBB4, …	FALSE
GO:0099699	integral component of synaptic membrane	[3, 4, 5, 6, 7, 8, 9]	[Group6]	10	5.07614	0.000117199	0.00246118	{Group6=6.197278421183853E-5}	{Group6=3.718367052710312E-4}	[CLSTN2, CNR1, KCNA1, KCNC1, NRP1, NRP2, OPRK1, PCDH8, SLC1A6, SLC6A3]	[ABHD6, ADAM22, ADAM23, ADCY1, ADCY8, ADORA1, ADORA2A, ADORA2B, ADRA1A, ADRA1D, ADRA2C, ADRB1, ANKK1, ATP2B1, ATP2B2, ATP2B4, CACNA1D, CACNG2, CACNG3, CACNG4, CACNG5, CACNG7, CADM3, CANX, CCT6A, CDH10, CDH9, CHRM1, CHRM2, CHRM3, CHRNA1, CHRNA10, CHRNA4, CHRNA6, CHRNA9, CHRNB1, CHRNB2, CHRND, CHRNE, CLSTN1, CLSTN2, CLSTN3, CNC2, CNIH1, CNIH2, CNIH4, CNR1, CNTNAP4, CSPG5, DAGLA, DCC, DHRS3, DRD1, D…	TRUE
GO:0044305	calyx of Held	[4, 5, 6, 7, 8, 9, 10]	[Group6]	3	13.0435	0.00238656	0.0238656	{Group6=6.197278421183853E-5}	{Group6=3.718367052710312E-4}	[CALB1, KCNA1, KCNC1]	[ACTB, ACTG1, ADORA1, CALB1, CPLX1, CPLX2, GIT1, GLRA1, HTR1B, ITSN1, KCNA1, KCNA2, KCNA3, KCNC1, KCNK2, NANOS1, NCS1, NOS1, POTEF, PRKCG, UNC13A, UNC13B, UNC13C]	FALSE
GO:0099055	integral component of postsynaptic membrane	[4, 5, 6, 7, 8, 9, 10]	[Group6]	8	5.40541	0.000370431	0.00629733	{Group6=6.197278421183853E-5}	{Group6=3.718367052710312E-4}	[CLSTN2, KCNA1, KCNC1, NRP1, NRP2, OPRK1, PCDH8, SLC6A3]	[ABHD6, ADAM22, ADCY1, ADORA1, ADORA2A, ADORA2B, ADRA1A, ADRA1D, ADRA2C, ADRB1, ANKK1, CACNG2, CACNG3, CACNG4, CACNG5, CACNG7, CANX, CCT6A, CDH10, CDH9, CHRM1, CHRM2, CHRM3, CHRNA1, CHRNA10, CHRNA6, CHRNA9, CHRNB1, CHRNB2, CHRND, CHRNE, CLSTN1, CLSTN2, CLSTN3, CNC2, CNIH1, CNIH2, CNIH4, CSPG5, DAGLA, DCC, DHRS3, DRD1, DRD2, DRD3, EFNB3, EPHA4, EPHA7, EPHB2, ERBB4, FLRT3, GABRA1, GABRA2, GABRA3, G…	FALSE
GO:0099056	integral component of presynaptic membrane	[4, 5, 6, 7, 8, 9, 10]	[Group6]	6	6.52174	0.000759036	0.00986747	{Group6=6.197278421183853E-5}	{Group6=3.718367052710312E-4}	[CNR1, KCNA1, KCNC1, OPRK1, SLC1A6, SLC6A3]	[ADAM23, ADCY8, ADORA1, ADORA2A, ADORA2B, ADRA1A, ADRA1D, ANKK1, ATP2B1, ATP2B2, ATP2B4, CACNA1D, CADM3, CANX, CCT6A, CDH10, CDH9, CHRM1, CHRM2, CHRM3, CHRNA4, CHRNA6, CHRNB2, CNR1, CNTNAP4, DHRS3, DRD1, DRD2, EFNB3, EPHA4, EPHB2, ERBB4, GABRA5, GGTA1P, GLRA1, GPM6A, GRIK2, GRIK4, GRIK5, GRM3, HTR1B, HTR2A, HTR3A, HTT, KCNA1, KCNA2, KCNA3, KCNC1, KCNJ3, KCNJ9, LRFN3, MAPK1, MDH2, METTL3, NCSTN, N…	FALSE
