# Supplementary material for: Integrated identification of key genes and pathways in Alzheimer’s disease via comprehensive bioinformatical analyses
Source: Hereditas. 2019 Jul 16;156:25. doi: 10.1186/s41065-019-0101-0 (PMC6636172; doi:10.1186/s41065-019-0101-0)
Supplement: Supplementary file 5 — Table S5. Information for molecular function analysis of DEGs from hippocampus. Included detailed information of results of molecular function analysis of DEGs from hippocampus. (XLSX 17 kb) [file 41065_2019_101_MOESM5_ESM.xlsx]

## Sheet: ClueGOResults3 NodeAttributeTab
Additional file 5: Table S5 Information for molecular function analysis of DEGs from hippocampus
GO ID	GO Term	GO Levels	GO Groups	Genes Number	% Associated Genes	Term P Value	Term P Value Corrected with Bonferroni step down	Group P Value	Group P Value Corrected with Bonferroni step down	Associated Genes Found	All Associated Genes	Over View Term
GO:0004714	transmembrane receptor protein tyrosine kinase activity	[5, 7]	[Group0]	5	5.74713	0.00391392	0.0352253	{Group0=0.003913924895738843}	{Group0=0.007827849791477687}	[EFEMP1, KIT, NRP1, NRP2, RET]	[ALK, AXL, BMX, CCDC6, CCNH, CDK7, CRIM1, CSF1R, CTPP, DDR1, DDR2, EFEMP1, EFNA3, EFNA4, EFNB3, EGFR, ELK3, EPHA1, EPHA10, EPHA2, EPHA3, EPHA4, EPHA5, EPHA6, EPHA7, EPHA8, EPHB1, EPHB2, EPHB3, EPHB4, EPHB6, ERBB2, ERBB3, ERBB4, F9, FGFR1, FGFR2, FGFR3, FGFR4, FGFRL1, FLG, FLT1, FLT3, FLT4, IGF1R, IGF2R, INSR, INSRR, KCNH8, KDR, KIT, KRT1, LTK, MAPK1, MERTK, MET, MME, MST1R, MT1A, MUSK, NAP1L1, NE…	TRUE
GO:0005242	inward rectifier potassium channel activity	[7, 8, 9, 10]	[Group7]	3	13.0435	0.00250938	0.032622	{Group7=5.4676985264221246E-5}	{Group7=4.3741588211376997E-4}	[KCNJ4, KCNJ5, KCNJ6]	[ABCC8, CUZD1, ERG, KCNE2, KCNH2, KCNJ1, KCNJ10, KCNJ11, KCNJ12, KCNJ13, KCNJ14, KCNJ15, KCNJ16, KCNJ18, KCNJ2, KCNJ3, KCNJ4, KCNJ5, KCNJ6, KCNJ8, KCNJ9, KCNK1, KCNK6]	FALSE
GO:0005244	voltage-gated ion channel activity	[5, 7]	[Group7]	11	4.82456	9.84186e-05	0.0015747	{Group7=5.4676985264221246E-5}	{Group7=4.3741588211376997E-4}	[CACNA1A, KCNA1, KCNC1, KCNG3, KCNIP2, KCNJ4, KCNJ5, KCNJ6, KCNK10, KCNQ5, SCN2B]	[ABCC8, ANO1, ANO6, ARL2BP, BSND, CACNA1A, CACNA1B, CACNA1C, CACNA1D, CACNA1E, CACNA1F, CACNA1G, CACNA1H, CACNA1I, CACNA1S, CACNA2D1, CACNA2D2, CACNA2D3, CACNA2D4, CACNB1, CACNB2, CACNB3, CACNB4, CACNG1, CACNG2, CACNG3, CACNG4, CACNG5, CACNG6, CACNG7, CACNG8, CALHM1, CATSPER1, CATSPER2, CATSPER3, CATSPER4, CD200, CLCA3P, CLCN1, CLCN2, CLCN3, CLCN4, CLCN5, CLCN6, CLCN7, CLCNKA, CLCNKB, CLIC1, CLIC…	FALSE
GO:0005249	voltage-gated potassium channel activity	[7, 8, 9]	[Group7]	8	8	2.67666e-05	0.000562099	{Group7=5.4676985264221246E-5}	{Group7=4.3741588211376997E-4}	[KCNA1, KCNC1, KCNG3, KCNIP2, KCNJ4, KCNJ5, KCNJ6, KCNQ5]	[ABCC8, CNGA1, CNGA2, CNGA3, CNGA4, CNGB1, CNGB3, CUZD1, ERG, HCN1, HCN2, HCN3, HCN4, KCNA1, KCNA10, KCNA2, KCNA3, KCNA4, KCNA5, KCNA6, KCNA7, KCNAB1, KCNAB2, KCNAB3, KCNB1, KCNB2, KCNC1, KCNC2, KCNC3, KCNC4, KCND1, KCND2, KCND3, KCNE1, KCNE1B, KCNE2, KCNE3, KCNE4, KCNE5, KCNF1, KCNG1, KCNG2, KCNG3, KCNG4, KCNH1, KCNH2, KCNH3, KCNH4, KCNH5, KCNH6, KCNH7, KCNH8, KCNIP2, KCNJ1, KCNJ10, KCNJ11, KCNJ…	FALSE
GO:0005251	delayed rectifier potassium channel activity	[8, 9, 10]	[Group7]	3	13.0435	0.00250938	0.032622	{Group7=5.4676985264221246E-5}	{Group7=4.3741588211376997E-4}	[KCNA1, KCNC1, KCNG3]	[CUZD1, ERG, KCNA1, KCNA2, KCNA3, KCNA4, KCNA5, KCNA6, KCNB1, KCNB2, KCNC1, KCNC2, KCNE1, KCNE2, KCNG1, KCNG2, KCNG3, KCNG4, KCNH1, KCNH2, KCNQ1, KCNS1, KCNS3]	FALSE
GO:0005267	potassium channel activity	[6, 7, 8]	[Group7]	9	6.42857	4.81768e-05	0.000963537	{Group7=5.4676985264221246E-5}	{Group7=4.3741588211376997E-4}	[KCNA1, KCNC1, KCNG3, KCNIP2, KCNJ4, KCNJ5, KCNJ6, KCNK10, KCNQ5]	[ABCC8, ABCC9, AQP1, CCT8L2, CNGA1, CNGA2, CNGA3, CNGA4, CNGB1, CNGB3, CUZD1, DKK1, ERG, FXYD4, GRIK1, GRIK2, GRIK3, GRIK4, GRIK5, GRM7, HCN1, HCN2, HCN3, HCN4, HPN, IKZF1, KCNA1, KCNA10, KCNA2, KCNA3, KCNA4, KCNA5, KCNA6, KCNA7, KCNAB1, KCNAB2, KCNAB3, KCNB1, KCNB2, KCNC1, KCNC2, KCNC3, KCNC4, KCND1, KCND2, KCND3, KCNE1, KCNE1B, KCNE2, KCNE3, KCNE4, KCNE5, KCNF1, KCNG1, KCNG2, KCNG3, KCNG4, KCNH…	FALSE
GO:0005310	dicarboxylic acid transmembrane transporter activity	[5, 7]	[Group6]	3	5.66038	0.0255563	0.0255563	{Group6=0.0025024118188104317}	{Group6=0.01251205909405216}	[SLC1A6, SLC26A10, SLC7A11]	[ABCC2, CYCSP51, CYLD, DTD1, FLOT1, KLHL1, NQO1, ODC1, OLFM4, PDE7A, PRMT1, PTGDS, RFC1, SAT1, SLC13A2, SLC13A3, SLC13A5, SLC16A10, SLC17A6, SLC17A7, SLC17A8, SLC19A1, SLC19A2, SLC1A1, SLC1A2, SLC1A3, SLC1A6, SLC1A7, SLC25A10, SLC25A11, SLC25A12, SLC25A13, SLC25A18, SLC25A21, SLC25A22, SLC25A32, SLC26A1, SLC26A10, SLC26A11, SLC26A2, SLC26A3, SLC26A4, SLC26A5, SLC26A6, SLC26A7, SLC26A8, SLC26A9, S…	TRUE
GO:0005539	glycosaminoglycan binding	[3]	[Group5]	13	4.3771	6.27762e-05	0.00119275	{Group5=6.277616930435432E-5}	{Group5=4.394331851304802E-4}	[CARD14, CD44, CTSG, ECM2, GREM2, INHBA, KCNA1, LTF, MPO, NRP1, NRP2, PCOLCE2, VEGFA]	[AAMP, ABCB6, ABI3BP, ACAN, ADA2, ADAMTS1, ADAMTS15, ADAMTS3, ADAMTS5, ADAMTS8, ADAMTSL5, ADGRE2, ADGRG1, AGER, AGRN, ANG, ANGPTL3, ANOS1, AOC1, APLP1, APLP2, APOA5, APOB, APOE, APOH, APP, APPL2, ASXL1, ATP6V0A4, ATR, ATXN3, AZU1, BCAN, BCKDK, BGN, BMP4, BMP7, BRD8, BSPH1, C1QBP, C4BPA, CARD14, CCDC80, CCL15, CCL23, CCL7, CCL8, CCNA2, CD44, CEL, CEMIP, CFH, CHRD, CLEC3B, COL11A1, COL13A1, COL25A1…	TRUE
GO:0008188	neuropeptide receptor activity	[5, 6]	[Group4]	3	5.66038	0.0255563	0.0255563	{Group4=0.02555633648875183}	{Group4=0.02555633648875183}	[KISS1R, MCHR1, SSTR2]	[BRS3, CD200R1, CXCR4, GAL, GALR1, GALR2, GALR3, GPR139, GPR143, GPR83, GPR84, GRPR, HCRTR2, KISS1R, LGALS1, MC2R, MCHR1, MDH2, NMBR, NMUR1, NMUR2, NPBWR1, NPBWR2, NPFFR1, NPFFR2, NPSR1, NPY1R, NPY2R, NPY4R, NPY5R, NTSR1, NTSR2, OA1, OPRM1, PRKAR1A, PRKAR2A, PRLHR, PROKR1, PROKR2, QRFPR, RXFP3, RXFP4, SORCS1, SORCS2, SORCS3, SSTR1, SSTR2, SSTR3, SSTR4, SSTR5, TACR1, TACR2, TACR3]	TRUE
GO:0008201	heparin binding	[3, 4]	[Group5]	11	5	7.15488e-05	0.00128788	{Group5=6.277616930435432E-5}	{Group5=4.394331851304802E-4}	[CTSG, ECM2, GREM2, INHBA, KCNA1, LTF, MPO, NRP1, NRP2, PCOLCE2, VEGFA]	[AAMP, ABI3BP, ADA2, ADAMTS1, ADAMTS15, ADAMTS3, ADAMTS5, ADAMTS8, ADAMTSL5, ADGRG1, AGER, ANG, ANGPTL3, ANOS1, AOC1, APLP1, APLP2, APOA5, APOB, APOE, APOH, APP, APPL2, ASXL1, ATP6V0A4, ATR, ATXN3, AZU1, BCKDK, BMP4, BMP7, BRD8, BSPH1, CCDC80, CCL15, CCL23, CCL7, CCL8, CCNA2, CEL, CFH, CHRD, CLEC3B, COL11A1, COL13A1, COL25A1, COL5A1, COL5A3, COMP, CRISP2, CRISPLD2, CTGF, CTSG, CXCL10, CXCL11, CXC…	FALSE
GO:0015079	potassium ion transmembrane transporter activity	[6, 7]	[Group7]	11	6.25	9.10335e-06	0.000200274	{Group7=5.4676985264221246E-5}	{Group7=4.3741588211376997E-4}	[ATP1A3, KCNA1, KCNC1, KCNG3, KCNIP2, KCNJ4, KCNJ5, KCNJ6, KCNK10, KCNQ5, SLC24A3]	[ABCC8, ABCC9, AQP1, ATP12A, ATP1A1, ATP1A2, ATP1A3, ATP1A4, ATP1B1, ATP1B2, ATP1B3, ATP4A, ATP4B, CCT8L2, CDKN1A, CNGA1, CNGA2, CNGA3, CNGA4, CNGB1, CNGB3, CUZD1, DKK1, ERG, FXYD2, FXYD4, GRIK1, GRIK2, GRIK3, GRIK4, GRIK5, GRM7, HCN1, HCN2, HCN3, HCN4, HPN, IKZF1, KCNA1, KCNA10, KCNA2, KCNA3, KCNA4, KCNA5, KCNA6, KCNA7, KCNAB1, KCNAB2, KCNAB3, KCNB1, KCNB2, KCNC1, KCNC2, KCNC3, KCNC4, KCND1, KCN…	TRUE
GO:0015301	anion:anion antiporter activity	[5, 7]	[Group6]	3	6.12245	0.0208067	0.0416134	{Group6=0.0025024118188104317}	{Group6=0.01251205909405216}	[SLC22A8, SLC26A10, SLC7A11]	[DTD1, FLOT1, G6PC, KCNK3, NBPF3, NQO1, PGP, PRPF6, PTGDS, RFC1, SAT1, SLC16A10, SLC19A1, SLC22A11, SLC22A6, SLC22A7, SLC22A8, SLC22A9, SLC25A11, SLC25A4, SLC25A5, SLC25A6, SLC26A1, SLC26A10, SLC26A11, SLC26A2, SLC26A3, SLC26A4, SLC26A5, SLC26A6, SLC26A7, SLC26A8, SLC26A9, SLC37A1, SLC37A2, SLC37A4, SLC38A1, SLC4A1, SLC4A10, SLC4A11, SLC4A2, SLC4A3, SLC4A4, SLC4A5, SLC4A7, SLC4A8, SLC4A9, SLC7A11…	FALSE
GO:0015467	G-protein activated inward rectifier potassium channel activity	[8, 9, 10, 11]	[Group7]	3	27.2727	0.00025991	0.00363873	{Group7=5.4676985264221246E-5}	{Group7=4.3741588211376997E-4}	[KCNJ4, KCNJ5, KCNJ6]	[KCNJ10, KCNJ12, KCNJ14, KCNJ15, KCNJ16, KCNJ2, KCNJ3, KCNJ4, KCNJ5, KCNJ6, KCNJ9]	FALSE
GO:0019955	cytokine binding	[3]	[Group1]	8	5.92593	0.00022299	0.00334485	{Group1=2.2299030398521746E-4}	{Group1=0.0013379418239113047}	[CRLF1, GREM2, IL12RB1, KIT, NRP1, NRP2, PDPN, WFIKKN2]	[A2M, ACKR1, ACKR2, ACKR3, ACKR4, ACVR1, ACVRL1, ATP6V0A4, BMPR2, C3CER1, CCR1, CCR10, CCR2, CCR3, CCR5, CCR6, CCR7, CD109, CD36, CD4, CD5, CD74, CER1, CHRD, CNTFR, COPS5, CRISP2, CRLF1, CSF1R, CSF3R, CX3CR1, CXCR1, CXCR2, CXCR3, CXCR4, CXCR6, ELANE, ENG, FAS, FASN, FUZ, FZD4, GAMT, GBP1, GDF5, GPRASP1, GPRASP2, GREM1, GREM2, GYPC, HAX1, HJV, HMGB1, HYAL2, IFNAR1, IFNGR1, IGKV1D-27, IL10RA, IL12A…	TRUE
GO:0022832	voltage-gated channel activity	[6]	[Group7]	11	4.82456	9.84186e-05	0.0015747	{Group7=5.4676985264221246E-5}	{Group7=4.3741588211376997E-4}	[CACNA1A, KCNA1, KCNC1, KCNG3, KCNIP2, KCNJ4, KCNJ5, KCNJ6, KCNK10, KCNQ5, SCN2B]	[ABCC8, ANO1, ANO6, ARL2BP, BSND, CACNA1A, CACNA1B, CACNA1C, CACNA1D, CACNA1E, CACNA1F, CACNA1G, CACNA1H, CACNA1I, CACNA1S, CACNA2D1, CACNA2D2, CACNA2D3, CACNA2D4, CACNB1, CACNB2, CACNB3, CACNB4, CACNG1, CACNG2, CACNG3, CACNG4, CACNG5, CACNG6, CACNG7, CACNG8, CALHM1, CATSPER1, CATSPER2, CATSPER3, CATSPER4, CD200, CLCA3P, CLCN1, CLCN2, CLCN3, CLCN4, CLCN5, CLCN6, CLCN7, CLCNKA, CLCNKB, CLIC1, CLIC…	FALSE
GO:0022843	voltage-gated cation channel activity	[6, 7, 8]	[Group7]	9	5.96026	8.66623e-05	0.00147326	{Group7=5.4676985264221246E-5}	{Group7=4.3741588211376997E-4}	[CACNA1A, KCNA1, KCNC1, KCNG3, KCNIP2, KCNJ4, KCNJ5, KCNJ6, KCNQ5]	[ABCC8, CACNA1A, CACNA1B, CACNA1C, CACNA1D, CACNA1E, CACNA1F, CACNA1G, CACNA1H, CACNA1I, CACNA1S, CACNA2D1, CACNA2D2, CACNA2D4, CACNB1, CACNB2, CACNB3, CACNB4, CACNG1, CACNG2, CACNG3, CACNG4, CACNG5, CACNG6, CACNG7, CACNG8, CALHM1, CATSPER1, CATSPER3, CATSPER4, CNGA1, CNGA2, CNGA3, CNGA4, CNGB1, CNGB3, CUZD1, ENTHD1, ERG, GAS6, GPRIN1, GRIN1, GRIN2A, GRIN2B, GRIN2C, GRIN2D, GRIN3A, HCN1, HCN2, HC…	FALSE
GO:0030506	ankyrin binding	[4]	[Group2]	3	12.5	0.00284277	0.0312704	{Group2=0.002842765722146293}	{Group2=0.008528297166438879}	[ATP1A3, OBSCN, RHCG]	[ATP1A1, ATP1A3, ATP1A4, CACNA1D, CDH1, CNC2, FLNC, FZR1, KCNJ11, KCNQ2, KCTD6, NRCAM, OBSCN, PLEC, PRKAR1A, RHAG, RHBG, RHCG, SCN5A, SLC4A1, SLC8A1, SPTB, SPTBN1, SPTBN4]	TRUE
GO:0051087	chaperone binding	[3]	[Group3]	6	5.17241	0.00273001	0.0327602	{Group3=0.0027300129231085397}	{Group3=0.010920051692434159}	[ATP1A3, CARD14, CP, DNAJB5, PDPN, PIH1D3]	[ABCB6, AHSA1, AHSA2P, ALB, AMFR, ATP1A1, ATP1A2, ATP1A3, ATP1A4, ATP7A, BAG1, BAG2, BAG3, BAG4, BAG5, BAK1, BAX, BIN1, BIRC2, BIRC5, C4BPA, CALR, CARD14, CDC25A, CDC37, CDC37L1, CDKN1B, CFTR, CIB1, CLU, CP, CTSC, DNAJA1, DNAJA2, DNAJA4, DNAJB1, DNAJB2, DNAJB4, DNAJB5, DNAJB6, DNAJB7, DNAJB8, DNAJB9, DNAJC1, DNAJC10, DNAJC3, DNLZ, ERP29, FGB, FICD, FN1, FNIP1, FNIP2, GAK, GATD3A, GET4, GNB5, GRPE…	TRUE
GO:0099516	ion antiporter activity	[4, 6]	[Group6]	5	5.95238	0.00336556	0.0336556	{Group6=0.0025024118188104317}	{Group6=0.01251205909405216}	[ATP1A3, SLC22A8, SLC24A3, SLC26A10, SLC7A11]	[ATP1A3, CADPS2, CAPS2, CNC2, DTD1, FLOT1, G6PC, HELLS, KCNK3, LETM1, NBPF3, NQO1, PGP, PRKAR1A, PRPF6, PTGDS, RFC1, SAT1, SLC11A1, SLC16A10, SLC19A1, SLC22A11, SLC22A4, SLC22A5, SLC22A6, SLC22A7, SLC22A8, SLC22A9, SLC24A1, SLC24A2, SLC24A3, SLC24A4, SLC24A5, SLC25A11, SLC25A4, SLC25A5, SLC25A6, SLC26A1, SLC26A10, SLC26A11, SLC26A2, SLC26A3, SLC26A4, SLC26A5, SLC26A6, SLC26A7, SLC26A8, SLC26A9, S…	FALSE
