# Supplementary material for: Integrated identification of key genes and pathways in Alzheimer’s disease via comprehensive bioinformatical analyses
Source: Hereditas. 2019 Jul 16;156:25. doi: 10.1186/s41065-019-0101-0 (PMC6636172; doi:10.1186/s41065-019-0101-0)
Supplement: Supplementary file 6 — Table S6. Information for biological process analysis of DEGs from entorhinal cortex. Included detailed information of results of biological process analysis of DEGs from entorhinal cortex. (XLSX 16 kb) [file 41065_2019_101_MOESM6_ESM.xlsx]

## Sheet: Sheet1
Additional file 6: Table S6 Information for biological process analysis of DEGs from entorhinal cortex
GOID	GOTerm	GOLevels	GOGroups	Nr. Genes	% Associated Genes	Term PValue	Term PValue Corrected with Bonferroni step down	Group PValue	Group PValue Corrected with Bonferroni step down	Associated Genes Found	All Associated Genes	OverViewTerm
GO:0001706	endoderm formation	[4, 5, 6, 7, 8]	[Group4]	4	6.15385	7.47657e-05	0.00127102	{Group4=3.808241421833344E-4}	{Group4=0.0022849448531000066}	[DUSP2, INHBA, LAMB3, RTF1]	[ADCYAP1R1, CDC73, COL11A1, COL12A1, COL4A2, COL5A1, COL5A2, COL6A1, COL7A1, COL8A1, CTR9, DKK1, DUSP1, DUSP12, DUSP2, DUSP4, DUSP5, DUSP6, EOMES, FN1, GATA6, HIF1A, HMGA2, HNF1B, HSBP1, IGHV3-75, INHBA, ITGA4, ITGA5, ITGA7, ITGAV, ITGB2, ITGB5, KLF6, LAMA3, LAMA4, LAMB1, LAMB3, LEO1, LHX1, LTBR, MESP1, MIP, MIXL1, MMP14, MMP15, MMP2, MMP8, MMP9, NANOG, NODAL, NOG, PAF1, PEX2, POU5F1, PSMG1, RTF1…	TRUE
GO:0002762	negative regulation of myeloid leukocyte differentiation	[5, 6, 7, 8, 9, 10, 11]	[Group0]	3	5.45455	0.000907303	0.00272191	{Group0=9.07302877183844E-4}	{Group0=0.001814605754367688}	[CARTPT, GPR68, INHBA]	[ADIPOQ, APCS, ATR, BGLAP, C1QC, CALCA, CARTPT, CCL3, CDK6, CEACAM1, CLDN18, CUL4A, FBN1, FBXO44, FBXW7, FSTL1, FSTL3, GATA2, GPR55, GPR68, HOXA7, IL4, INHA, INHBA, INPP5D, LILRA6, LILRB1, LILRB3, LILRB4, LRRC17, LTF, LYN, MAFB, MYC, NF1, NME2, PIAS3, PIK3R1, PITX2, PTPN2, PVT1, RARA, SFRP1, TAS2R14, TCTA, TLR3, TLR4, TMEM178A, TOB2, TRIB1, UBASH3B, ZBTB46, ZBTB7C, ZFPM1, ZNF675]	TRUE
GO:0007492	endoderm development	[4]	[Group4]	4	4.0404	0.000380824	0.00418907	{Group4=3.808241421833344E-4}	{Group4=0.0022849448531000066}	[DUSP2, INHBA, LAMB3, RTF1]	[ADCYAP1R1, APELA, ARC, BMP4, BMPR1A, BPTF, BRF1, CDC73, COL11A1, COL12A1, COL4A2, COL5A1, COL5A2, COL6A1, COL7A1, COL8A1, CTR9, DKK1, DUSP1, DUSP12, DUSP2, DUSP4, DUSP5, DUSP6, EOMES, EPB41L5, ETF1, EXT1, FGF8, FN1, GATA4, GATA6, GDF3, HDAC1, HHEX, HIF1A, HMGA2, HNF1B, HOXC11, HSBP1, IGHV3-75, INHBA, ITGA4, ITGA5, ITGA7, ITGAV, ITGB2, ITGB5, KIF16B, KLF6, LAMA3, LAMA4, LAMB1, LAMB2, LAMB3, LAMC1…	FALSE
GO:0007618	mating	[3, 4, 5]	[Group6]	3	5.55556	0.000859922	0.00343969	{Group6=0.004535989577975802}	{Group6=0.004535989577975802}	[AVP, OXT, TAC1]	[ABAT, ACVR2A, ADA, APP, ATP6V0A4, AVP, AVPR1A, CNR1, DDO, DMRTA1, DRD1, DRD5, EDDM3A, EDNRB, FUOM, GPRIN1, GRIN1, HEXB, HTT, IFNAR1, IGKV1D-27, KLK14, LGALS7B, MAPK8IP2, MTNR1A, NHLH2, NLRP3, NR1D1, OR2H2, OXT, OXTR, P2RX1, P2RY1, PCDHA4, PCDHA@, PI3, PLP2, PPOX, PPP1R1B, PPP1R9B, PTEN, SCN9A, SEMG1, SERPINE2, SGCG, SLC6A4, TAC1, TACR1, TADA1, TEP1, TH, THRA, THRB, UBE2Q1]	FALSE
GO:0007620	copulation	[4, 5, 6]	[Group6]	3	10.3448	0.00013471	0.00215535	{Group6=0.004535989577975802}	{Group6=0.004535989577975802}	[AVP, OXT, TAC1]	[ABAT, ACVR2A, ADA, AVP, AVPR1A, CNR1, DDO, EDDM3A, EDNRB, HTT, IFNAR1, KLK14, LGALS7B, NLRP3, OXT, OXTR, P2RX1, P2RY1, PCDHA4, PCDHA@, PI3, PPOX, SCN9A, SEMG1, SERPINE2, SLC6A4, TAC1, TACR1, TADA1]	FALSE
GO:0030728	ovulation	[3, 4, 5, 6, 7]	[Group5]	3	9.67742	0.0001649	0.0023086	{Group5=1.0275577963619851E-4}	{Group5=7.192904574533895E-4}	[INHBA, PTGS2, RGS2]	[ADAMTS1, AFP, CDH11, CGB1, CGB2, COX2, EREG, FOXO3, GPR149, HPGD, IL4R, IMMP2L, INHBA, INHBB, KMT2B, KMT2D, LEP, LHB, MMP19, MTCO2P12, NANOS3, NOS3, NRIP1, PGR, PTGS2, RGS2, RIEG2, SIRT1, TNFAIP6, TRIM26, TXN2]	FALSE
GO:0032570	response to progesterone	[4, 5, 6]	[Group2]	3	6.38298	0.000571899	0.00514709	{Group2=5.718993566447986E-4}	{Group2=0.0022875974265791944}	[FOSB, FOSL1, OXT]	[ABHD2, ACOD1, BAD, CA5A, CACNA1C, CAV1, CAV2, CD38, CLDN4, CRISP2, DSG1, DSG2, FGR, FOS, FOSB, FOSL1, GABRB1, GCY, GNPDA1, GPI, NCOA1, NCOA2, NKX2-2, NR1H3, OXT, OXTR, PRSS55, PTGER2, PTN, RAMP2, RELA, SOX10, SRC, SREBF1, TACR1, TBXAS1, TGFB1, TGFB2, TGFB3, THBS1, TLR2, TSPO, TXNIP, TYMS, UBE3A, WBP2, YAP1]	TRUE
GO:0034694	response to prostaglandin	[4, 5, 6]	[Group3]	3	6.66667	0.000502944	0.00502944	{Group3=5.029435713709169E-4}	{Group3=0.0025147178568545843}	[GPR3, INHBA, OXT]	[AANAT, ACACA, ADCY6, AKAP8, AKR1C1, AKR1C2, AKR1C3, AKT1, APOB, ATR, BCL2A1, CCL19, CCL21, CCR7, DDH2, EDN1, FSTL1, GNAS, GNB1, GNG2, GNRH1, GPR3, GSM1, INHBA, MECOM, OXT, P2RY4, P2RY6, PPARG, PPP1R9B, PRKAA1, PRKAA2, PRKAB1, PRKCE, PTGDR, PTGER2, PTGER4, PTGFR, PTK2B, SFRP1, TGFBR3, TNC, TNFSF4, TNNC1, YY1]	FALSE
GO:0034695	response to prostaglandin E	[5, 6, 7]	[Group3]	3	8.57143	0.000237753	0.00285303	{Group3=5.029435713709169E-4}	{Group3=0.0025147178568545843}	[GPR3, INHBA, OXT]	[AANAT, ACACA, ADCY6, AKAP8, AKT1, ATR, BCL2A1, CCL19, CCL21, CCR7, FSTL1, GNAS, GNB1, GNG2, GNRH1, GPR3, GSM1, INHBA, MECOM, OXT, P2RY4, P2RY6, PPARG, PPP1R9B, PRKAA1, PRKAA2, PRKAB1, PRKCE, PTGDR, PTGER2, PTGER4, PTK2B, SFRP1, TGFBR3, TNFSF4]	TRUE
GO:0035812	renal sodium excretion	[4, 9]	[Group6]	3	10	0.000149309	0.00223964	{Group6=0.004535989577975802}	{Group6=0.004535989577975802}	[AVP, OXT, TAC1]	[ADORA1, ADORA2A, ADORA2B, AGT, AGTR1, AGTR2, AGXT, ANKK1, AVP, AVPR1A, COMT, CORIN, CRNKL1, DRD2, DRD3, EDN1, EDNRB, GNAI2, IFNAR1, MLLT6, NLRP3, NPPB, NPR1, OXT, PPOX, SNX5, SPX, TAC1, TACR1, UTS2R]	FALSE
GO:0035813	regulation of renal sodium excretion	[3, 5, 6, 7, 10]	[Group6]	3	10.3448	0.00013471	0.00215535	{Group6=0.004535989577975802}	{Group6=0.004535989577975802}	[AVP, OXT, TAC1]	[ADORA1, ADORA2A, ADORA2B, AGT, AGTR1, AGTR2, AGXT, ANKK1, AVP, AVPR1A, COMT, CORIN, CRNKL1, DRD2, DRD3, EDN1, EDNRB, GNAI2, IFNAR1, NLRP3, NPPB, NPR1, OXT, PPOX, SNX5, SPX, TAC1, TACR1, UTS2R]	FALSE
GO:0035987	endodermal cell differentiation	[4, 5, 6, 7, 8, 9]	[Group4]	3	6	0.000686212	0.00411727	{Group4=3.808241421833344E-4}	{Group4=0.0022849448531000066}	[INHBA, LAMB3, RTF1]	[CDC73, COL11A1, COL12A1, COL4A2, COL5A1, COL5A2, COL6A1, COL7A1, COL8A1, CTR9, DKK1, DUSP6, EOMES, FN1, GATA6, HIF1A, HMGA2, HNF1B, HSBP1, INHBA, ITGA4, ITGA5, ITGA7, ITGAV, ITGB2, ITGB5, LAMA3, LAMA4, LAMB1, LAMB3, LEO1, LTBR, MESP1, MIXL1, MMP14, MMP15, MMP2, MMP8, MMP9, NANOG, NODAL, PAF1, PEX2, POU5F1, RTF1, SETD2, SLC22A3, SOX17, SOX2, VTN]	FALSE
GO:0044062	regulation of excretion	[4, 5, 6]	[Group6]	3	9.375	0.000181511	0.00235965	{Group6=0.004535989577975802}	{Group6=0.004535989577975802}	[AVP, OXT, TAC1]	[ADORA1, ADORA2A, ADORA2B, AGT, AGTR1, AGTR2, AGXT, ANKK1, AVP, AVPR1A, COMT, CORIN, CRNKL1, DRD2, DRD3, EDN1, EDNRB, GNAI2, IFNAR1, NLRP3, NPHS1, NPPB, NPR1, OXT, PPOX, SLC9A3R1, SNX5, SPX, STC1, TAC1, TACR1, UTS2R]	FALSE
GO:0045104	intermediate filament cytoskeleton organization	[3, 5]	[Group1]	3	5.55556	0.000859922	0.00343969	{Group1=8.59921677380325E-4}	{Group1=0.002579765032140975}	[DST, NEFH, PKP2]	[AGFG1, ATP8A2, ATXN3, BFSP2, CSNK1A1, DCAF1, DES, DNAJA1, DNAJB6, DSP, DSPP, DST, EPPK1, ERBIN, FAM83H, FYN, GFAP, HSP90AA1, INA, KLHL24, KRT14, KRT16, KRT17, KRT18, KRT2, KRT20, KRT25, KRT3, KRT6A, KRT6C, KRT71, KRT74, KRT9, MTM1, NDEL1, NEFH, NEFL, NEFM, NES, PKP1, PKP2, RAF1, RIPK1, RNASE3, RPAIN, SHH, SOD1, SYNM, TMEM245, TMPO, TOR1A, VIM, VPS54, ZHX2]	TRUE
GO:0045777	positive regulation of blood pressure	[4, 6]	[Group6]	3	6.12245	0.000646626	0.00452638	{Group6=0.004535989577975802}	{Group6=0.004535989577975802}	[AVP, CARTPT, OXT]	[ACTR1A, ADH5, ADORA1, ADRA1A, ADRA1B, ADRA1D, ADRA2B, ADRB1, AGT, AGXT, ALDH1L1, ANGPTL1, APOBEC2, AVP, AVPR1A, CARTPT, CNR1, CYBA, CYP11B2, DRD5, F11R, GLP1R, GRIP2, HSD11B2, ID2, IFNAR1, NLRP3, NMU, NPFF, NR2F1, NR2F2, OR51E2, OXT, OXTR, PCDHA4, PCDHA@, PDE4D, PITX2, PPOX, PTMA, QRFP, RHOA, SPX, TACR1, TACR3, TBXA2R, TPM1, UTS2R, WNK1]	FALSE
GO:0045933	positive regulation of muscle contraction	[3, 4, 5, 6, 7]	[Group5]	3	4.54545	0.00154043	0.00154043	{Group5=1.0275577963619851E-4}	{Group5=7.192904574533895E-4}	[OXT, PTGS2, RGS2]	[ABAT, ACE2, ACTN3, ADA, ADRA1A, ADRA1B, ADRA1D, ADRA2B, ATP1A1, ATP1A3, ATP1A4, ATP2A1, CHGA, CHRM3, COX2, CTGF, CTTN, EDN1, EDN2, ENO1, F2R, GHRL, GHSR, GPER1, GSTO1, ITGA2, KCNA4, KCNQ1, KIT, MTCO2P12, MYOCD, NMU, NOS1AP, NPNT, NPPA, NPY2R, NR1I2, OXT, OXTR, PBK, PROK2, PTAFR, PTGS2, PWAR1, RGS2, RHOA, RIEG2, RNF207, SLC52A2, SMTN, SPHK1, SPX, SRF, SYMPK, TACR1, TACR2, TACR3, TADA1, TBXA2R, TE…	TRUE
GO:0050873	brown fat cell differentiation	[5]	[Group5]	3	5.88235	0.000727312	0.00363656	{Group5=1.0275577963619851E-4}	{Group5=7.192904574533895E-4}	[LAMB3, PTGS2, RGS2]	[ADIG, ADIPOQ, ADRB1, ADRB2, ADRB3, ALDH6A1, ARL4A, BNIP3, CDH11, CEBPA, CEBPB, COX2, DUSP10, EBF2, ERO1A, FABP4, FNDC5, FTO, HNRNPK, HNRNPU, INS, ITGA6, KLK3, LAMA4, LAMB3, LEP, LGALS13, LRG1, MAPK14, MB, METRNL, MTCO2P12, MTOR, NAPEPLD, NUDT7, PEX11A, PLAC8, PPARGC1A, PRDM16, PTGS2, RGS2, RIEG2, SH2B2, SIRT1, SLC2A4, TRPV4, UCP1, VSTM2A, ZBTB7B, ZBTB7C, ZNF516]	FALSE
GO:0051954	positive regulation of amine transport	[3, 4, 5, 6, 7]	[Group6]	3	6.25	0.000608529	0.00486823	{Group6=0.004535989577975802}	{Group6=0.004535989577975802}	[AVP, CARTPT, OXT]	[ABAT, ACE2, ADORA2A, ADORA2B, AGT, AGXT, ANKK1, ARL6IP1, AVP, AVPR1A, CARTPT, CCK, CHRNB2, CLTRN, CXCL12, DPYSL2, DRD2, DRD4, EIF4G2, GDNF, GRK2, IFNAR1, KCNB1, KMO, NAT1, NLRP3, NPY2R, NTSR1, OPRK1, OXT, OXTR, P2RX7, PBX2, PINK1, PPOX, PSEN1, RAB3B, RAB3GAP1, RIPK2, SLC38A3, SLC6A2, STX1A, STXBP1, SYT4, TACR2, TAS2R62P, TBC1D8, TRH]	FALSE
GO:0055078	sodium ion homeostasis	[8]	[Group6]	3	5.26316	0.00100696	0.00201393	{Group6=0.004535989577975802}	{Group6=0.004535989577975802}	[AVP, OXT, TAC1]	[ADORA1, ADORA2A, ADORA2B, AGT, AGTR1, AGTR2, AGXT, ANKK1, ATP1A1, ATP1A2, ATP1A3, ATP1A4, ATP1B1, ATP1B2, ATP1B3, AVP, AVPR1A, C7, CNC2, COMT, CORIN, CRNKL1, CXCL10, CYP11B2, CYP4A11, CYP4F12, CYP4F2, DRD2, DRD3, EDN1, EDNRB, GNAI2, IFNAR1, IGLC7, MC3R, MLLT6, NEDD4L, NLRP3, NPPB, NPR1, OXT, PPOX, PRKAR1A, SCNN1A, SCNN1B, SCNN1G, SLC8A1, SLC9A1, SNX5, SPX, TAC1, TACR1, TFAP2B, TMPRSS3, TMPRSS4, …	TRUE
GO:0098801	regulation of renal system process	[4, 5]	[Group6]	3	5.26316	0.00100696	0.00201393	{Group6=0.004535989577975802}	{Group6=0.004535989577975802}	[AVP, OXT, TAC1]	[ADIPOQ, ADORA1, ADORA2A, ADORA2B, AGT, AGTR1, AGTR2, AGXT, ANKK1, AVP, AVPR1A, COMT, CORIN, CRNKL1, CYBA, DRD2, DRD3, EDN1, EDNRB, EMP2, F2R, F2RL1, GAS6, GJA1, GJA5, GNAI2, IFNAR1, INPP5K, IRF6, NLRP3, NPPB, NPR1, NR1I2, OR51E2, OXT, PDGFB, PLEKHM2, PPOX, PTPRO, PTPRU, PWAR1, SLC52A1, SLC52A2, SNW1, SNX5, SPHKAP, SPX, STC1, TAC1, TACR1, TERC, TFRC, TMEFF2, TXNRD1, TXNRD2, UTS2R, ZBTB7C]	FALSE
