# Supplementary material for: Integrated identification of key genes and pathways in Alzheimer’s disease via comprehensive bioinformatical analyses
Source: Hereditas. 2019 Jul 16;156:25. doi: 10.1186/s41065-019-0101-0 (PMC6636172; doi:10.1186/s41065-019-0101-0)
Supplement: Supplementary file 7 — Table S7. Pathway enrichment analyses of DEGs. Included detailed information of pathway enrichment analyses of DEGs from hippocampus and entorhinal cortex. (XLSX 12 kb) [file 41065_2019_101_MOESM7_ESM.xlsx]

## Sheet: Sheet1
Additional file 7: Table S7 Pathway enrichment analyses of DEGs
GO ID	GO Term	Genes Number	% Associated Genes	Term P Value	Associated Genes Found
KEGG (hippocampus)
KEGG:04728	Dopaminergic synapse	6	4.58015	0.00499143	[CACNA1A, CALY, KCNJ5, KCNJ6, SLC6A3, TH]
KEGG:05030	Cocaine addiction	5	10.2041	0.000293046	[BDNF, FOSB, PDYN, SLC6A3, TH]
KEGG:05031	Amphetamine addiction	5	7.35294	0.00133738	[ARC, FOSB, PDYN, SLC6A3, TH]
Reactome pathways (hippocampus)
R-HSA:112315	Transmission across Chemical Synapses	10	4.42478	0.000565102	[ACHE, CACNA1A, GABRG2, GLS2, KCNJ4, KCNJ5, KCNJ6, SLC1A6, SLC6A3, SYN2]
R-HSA:112316	Neuronal System	17	4.61956	3.54835e-06	[ACHE, CACNA1A, GABRG2, GLS2, HOMER2, KCNA1, KCNC1, KCNG3, KCNJ4, KCNJ5, KCNJ6, KCNK10, KCNQ5, SLC1A6, SLC6A3, SYN2, SYT2]
R-HSA:1296071	Potassium Channels	8	8.08081	3.37755e-05	[KCNA1, KCNC1, KCNG3, KCNJ4, KCNJ5, KCNJ6, KCNK10, KCNQ5]
R-HSA:1296072	Voltage gated Potassium channels	4	9.30232	0.0020353	[KCNA1, KCNC1, KCNG3, KCNQ5]
R-HSA:5576891	Cardiac conduction	7	4.96454	0.00201384	[ATP1A3, KCNIP2, KCNJ4, KCNK10, NKX2-5, SCN2B, WWTR1]
Wikipathways (hippocampus)
WP:2406	Cardiac Progenitor Differentiation	4	7.54717	0.00524235	[INHBA,KIT, KX2-5, SOX1]
WP:2855	Dopaminergic Neurogenesis	3	10	0.00716237	[RET,SLC6A3,TH]
WP:516	Hypertrophy Model	3	15	0.00221327	[IFRD1,NR4A3,VEGFA]
WP:706	Sudden Infant Death Syndrome (SIDS) Susceptibility Pathways	7	4.26829	0.00600524	[ATP1A3,BDNF,RET, SSTR2,TAC1,TH,VEGFA]
WP:727	Monoamine Transport	5	15.625	5.66924e-05	[ACHE,AMPH,SLC6A3, TH,TNFRSF11B]
KEGG (entorhinal cortex)
KEGG:05222	Small cell lung cancer	4	4.34	0.025	[CKS2,COL4A1,LAMB3, PTGS2]
Reactome pathways (entorhinal cortex)
R-HAS:416476	G alpha (q) signalling events	6	2.92	0.0192	[AVP,GPR68,OXT, PMCH,RGS2,TAC1]
R-HAS:375276	Peptide ligand-binding receptors	5	2.73	0.0366	[AVP,CX3CR1,OXT, PMCH,TAC1]
R-HAS：388479	Vasopressin-like receptors	2	33.333	0.0366	[AVP,OXT]
R-HAS：373076	Class A/1 (Rhodopsin-like receptors)	6	1.93	0.0426	[AVP,CX3CR1,GPR68, OXT,PMCH,TAC1]
R-HAS:446107	Type I hemidesmosome assembly	2	18.18	0.0426	[DST,LAMB3]
